# Diverse Early Life-History Strategies in Migratory Amazonian Catfish: Implications for Conservation and Management

Jens C. Hegg<sup>1\*</sup>, Tommaso Giarrizzo<sup>2</sup>, and Brian P. Kennedy<sup>1,3</sup>

<sup>1</sup> Department of Fish and Wildlife Sciences, University of Idaho, Moscow, ID, USA

<sup>2</sup> Laboratório de Biologia Pesqueira - Manejo dos Recursos Aquáticos, Universidade Federal do Pará (UFPA), Belém, PA, Brazil

<sup>3</sup> Departments of Geological Sciences and Biological Sciences, University of Idaho, Moscow, ID, USA

\* Corresponding Author

hegg1432@vandals.uidaho.edu (JH)

## Abstract

Animal migrations provide important ecological functions and can allow for increased biodiversity through habitat and niche diversification. However, aquatic migrations in general, and those of the world's largest fish in particular, are imperiled worldwide and are often poorly understood. Several species of large Amazonian catfish carry out some of the longest freshwater fish migrations in the world, travelling from the Amazon River estuary to the Andes foothills. These species are important apex predators

33 in the main stem rivers of the Amazon Basin and make up the regions largest fishery.  
34 They are also the only species to utilize the entire Amazon Basin to complete their life  
35 cycle. Studies indicate both that the fisheries may be declining due to overfishing, and  
36 that the proposed and completed dams in their upstream range threaten spawning  
37 migrations. Despite this, surprisingly little is known about the details of these species'  
38 migrations, or their life history. Otolith microchemistry has been an effective method for  
39 quantifying and reconstructing fish migrations worldwide across multiple spatial scales  
40 and may provide a powerful tool to understand the movements of Amazonian migratory  
41 catfish. Our objective was to describe the migratory behaviors of the three most populous  
42 and commercially important migratory catfish species, Dourada (*Brachyplatystoma*  
43 *rousseauxii*), Piramutaba (*Brachyplatystoma vaillantii*), and Piraiba (*Brachyplatystoma*  
44 *filamentosum*). We collected fish from the mouth of the Amazon River and the Central  
45 Amazon and used strontium isotope signatures ( $^{87}\text{Sr}/^{86}\text{Sr}$ ) recorded in their otoliths to  
46 determine the location of early rearing and subsequent. Fish location was determined  
47 through discriminant function classification, using water chemistry data from the  
48 literature as a training set. Where water chemistry data was unavailable, we successfully  
49 in predicted  $^{87}\text{Sr}/^{86}\text{Sr}$  isotope values using a regression-based approach that related the  
50 geology of the upstream watershed to the Sr isotope ratio. Our results provide the first  
51 reported otolith microchemical reconstruction of *Brachyplatystoma* migratory  
52 movements in the Amazon Basin. Our results indicate that juveniles exhibit diverse  
53 rearing strategies, rearing in both upstream and estuary environments. This contrasts with  
54 the prevailing understanding that juveniles rear in the estuary before migrating upstream;  
55 however it is supported by some fisheries data that has indicated the presence of alternate

56 spawning and rearing life-histories. The presence of alternate juvenile rearing strategies  
57 may have important implications for conservation and management of the fisheries in the  
58 region.

## 59 Introduction

60

61 Animal migration provides many important ecological functions: they can be a stabilizing  
62 strategy in seasonal environments; offer transitory habitats for large populations; often transport  
63 materials across ecosystem boundaries; and may increase a regions biodiversity [1]. Large-scale  
64 migrations shed light on ecosystem connectivity across scales and can be used as a lens to  
65 understand broader behavioral responses to the environment and links to physical processes [2–  
66 4]. However, migrations worldwide are under threat from the alteration of migratory pathways,  
67 habitat loss, climatic changes and anthropogenic changes to the landscape [5]. In aquatic  
68 systems, changes in upstream land use and the placement of dams have had significant impacts  
69 on ecosystems and migrations worldwide [6–11]. This is particularly true for large migratory fish  
70 that are under threat in many of the world's largest river systems [12–14]. Despite this, many  
71 large migratory fish species are not well understood [14].

72 Globally, dams and water resources challenges in the two largest rivers in China provide  
73 an example of the ongoing changes to large rivers and their effects on aquatic species, including  
74 sturgeon and paddlefish [15]. In South America, transnational river systems and a lack of  
75 coordinated research of aquatic systems may result in losses to unspecified levels of biodiversity  
76 [16–20]. New dams present a unique challenge to migratory fish in the region. Because the  
77 young of many Amazonian species undergo a drifting larval stage, even if adults can pass above  
78 dams the lack of flow in reservoirs creates a barrier that drifting juveniles are unable to surmount  
79 on their way downstream [21].

80 Several species of Amazonian catfish in the genus *Brachyplatystoma* carry out some of  
81 the longest freshwater fish migrations in the world, travelling over 4,500 km from rearing areas

82 in the Amazon estuary to spawning grounds in rivers in the foothills of the Andes [22–24]. These  
83 species largely inhabit whitewater and clearwater rivers within the Amazon Basin [sensu 25,26],  
84 with rare reports in tannic blackwater rivers [23]. These catfish species are the only known  
85 organisms, terrestrial or aquatic, that require the entire length of the Amazon basin to complete  
86 their life cycle [23]. They are also one of the few apex predators in the pelagic and demersal  
87 zones of the largest Amazonian rivers, playing an important role in trophic dynamics and  
88 ecosystem functioning within the entire basin [27]. However, evidence indicates that the fisheries  
89 for the most populous species are in decline, potentially due to overfishing [22,28]. The reliance  
90 of these species on headwater streams for spawning leaves adults and larva vulnerable to  
91 blocking of their migration paths by dams and their reservoirs [21,29].

92 Surprisingly little is known about the life history of migratory Amazonian catfish given  
93 that the three most abundant *Brachyplatystoma* taxa support the largest fisheries in the Amazon  
94 Basin [23,24]. Dourada (*Brachyplatystoma rousseauxii*) is a pelagic predator found throughout  
95 the whitewater and clearwater rivers of the Amazon and supports the largest fishery in the  
96 Amazon [27,29]. Piramutaba (*Brachyplatystoma vaillantii*) make up a second large export  
97 fishery and are found almost exclusively in the Amazon River mainstem, whitewater tributaries,  
98 and the estuary [30–32]. Piraíba (*Brachyplatystoma filamentosum*) is the largest of the migratory  
99 catfish, present in whitewater rivers throughout the Amazon basin. It is also the most locally  
100 exploited and least understood of these three species [22]. The expansive scale of the Amazon  
101 Basin, and the large size of the rivers these fish inhabit, have made tracking and reconstructing  
102 their movements very difficult [32]. Our current understanding of the migratory behavior of  
103 migratory Amazonian catfish is based on fishing records (including the catch timing and size of  
104 fish across the Amazon basin) and a growing number of scientific sampling efforts [23,28,31,33–

105 36]. After hatching in the upper reaches of the whitewater rivers originating in the Andes, larvae  
106 of these species drift downstream for two to four weeks before reaching the Amazon estuary.  
107 Juveniles rear in the estuary before commencing an upstream migration that coincides with the  
108 seasonal flood pulse. Genetic data indicate that dourada may home to natal tributaries in the  
109 basin to spawn [37,38].

110 Otolith microchemistry has been an effective method for quantifying and reconstructing  
111 fish migrations worldwide across multiple spatial scales [39–46]. Strontium ratio in particular  
112 has become a powerful tool for determining movement and location because it is not fractionated  
113 biologically. Thus, the signatures recorded in otoliths match the water through which fish pass  
114 [43,47–50]. Studies of geological weathering throughout the Amazon basin have provided  
115 detailed, multi-year records of micro-chemical and isotopic chemistry in the largest rivers of the  
116 basin. These data provide the required background sampling necessary to tie regional otolith  
117 signatures to geographic location [51–53] (Figure 1A, Table 1). Recent studies have also shown  
118 the feasibility of predicting  $^{87}\text{Sr}/^{86}\text{Sr}$  signatures of unknown watersheds using the geologic  
119 makeup of the basin, allowing researchers to characterize strontium signatures of unsampled  
120 areas [54,55]. These advances point to otolith microchemistry as a potentially powerful tool to  
121 understand the movements of Amazonian migratory catfish.

122 Our objective was to describe the migratory behaviors of large, migratory catfish in the  
123 Amazon River basin using otolith microchemistry. We focused our study on the three most  
124 populous and commercially important species in the Amazon Basin. We sought to determine the  
125 location of early rearing and subsequent movement in dourada, pirimutaba, and piraíba using  
126 samples collected from two, large fish markets at the mouth of the Amazon River and in the  
127 central Amazon. We determined the movement patterns over the lifetime of individual fish using

128 laser ablation isotope mass spectrometry of their otoliths. Areas of stable signature were  
129 identified statistically throughout the chemical profile of the otolith, which were then classified  
130 to their location within the basin using discriminant function analysis. The discriminant function  
131 was created using a training set of  $^{87}\text{Sr}/^{86}\text{Sr}$  samples from rivers throughout the Amazon basin.  
132 These samples were obtained from the geological literature. Where river  $^{87}\text{Sr}/^{86}\text{Sr}$  values were  
133 unknown, we used established relationships between surface water  $^{87}\text{Sr}/^{86}\text{Sr}$  values and the age  
134 and composition of the underlying watershed geology to predict these signatures.

135

136

## 137 **Ethical statement**

138

139 Ethical approval was not required for this study, as all fish were collected as part of routine  
140 fishing procedures. Fish were sacrificed by the artisanal fishermen in Manaus and Belém using  
141 standard fisheries practices and donated to the authors.

142

143 No field permits were demanded to collect any samples from any location, since all samples  
144 derived from commercial catch. None of the species included in this investigation are currently  
145 protected or endangered. Therefore, no additional special permits were necessary. Permission to  
146 export the otolith samples was granted by the Brazilian Government with permit number:  
147 116217 (MMA, IBAMA, CITES 09/01/2013).

148

149

## 150 **Methods**

151

## 152 **Otolith Collection**

153           In March 2012, a total of 24 paired lapillus otolith samples (16 pairs for dourada, 5 for  
154 piramutaba and 3 for piraíba) were collected from the two major fishing ports of Brazilian  
155 Amazonia, the cities of Manaus and Belém (Table 1, Figure 1A). These cities are located 1,606  
156 river kilometers apart. Manaus (03°05'39.60"S, 60°01'33.63"W), is the largest city in the central  
157 Amazon, located at the confluence of the whitewater Solimões River with the blackwater Negro  
158 River. Belém (01°27'18.04"S 48°30'08.90"W), is situated on the banks of the Amazon estuary  
159 and is the main landing port of large migratory catfishes fisheries in Brazil [30]. Prior to otolith  
160 collection the total length (TL) and weight (W) of each fish was recorded: dourada: mean TL =  
161 83.6 cm, mean W = 8.58 kg; piramutaba: mean TL = 67.6 cm, mean W = 3.34 kg; piraíba: mean  
162 TL =186.6 cm, mean W = 86.6 kg. Piramutaba were gutted prior to collection so weight was  
163 estimated using a length-to-weight ratio from Pirker [56].

164           Fish collected from Manaus were captured in the mainstem Amazon River between the  
165 mouth of the Madeira River and Manaus as reported by the fisherman. Thus, we would expect  
166 the chemical signatures representing the end of the fish's life (signatures from the edge of the  
167 otolith) of fish caught in Manaus to represent signatures in the mainstem Amazon River or its  
168 tributaries upstream of the Madeira River. Fish collected in Belém were captured in the estuary  
169 between 60 km and 150 km from Belém according to the fisherman. The otolith edge chemistry  
170 of fish caught in Belém are therefore assumed to match the signature of the estuary, the lower  
171 Amazon tributaries, or the lower Amazon River mainstem. Because the  $^{87}\text{Sr}/^{86}\text{Sr}$  signature can  
172 take days to weeks to equilibrate and accumulate enough material to reliably sample, it is  
173 possible that fish could exhibit signatures other than the location of capture if they had recently



174 moved from a habitat with a different signature.

175

## 176 **Otolith Analysis**

177 The left lapillus otolith from each sample was prepared using standard methods of  
178 mounting, transverse sectioning with a high precision saw, and abrasive polishing to reveal the  
179 rings [34,57] (Figure 2). If the left otolith was missing or unavailable the right otolith was used  
180 for analysis. Otoliths were then analyzed at the GeoAnalytical Laboratory at Washington State  
181 University using a Finnigan Neptune (ThermoScientific) multi-collector inductively coupled  
182 plasma mass spectrometer coupled with a New Wave UP-213 laser ablation sampling system  
183 (LA-MC-ICPMS). We used a marine shell standard to evaluate measurement error relative to the  
184 global marine signature of 0.70918 [58]. Repeated analyses of a marine shell signature provided  
185 an average  $^{87}\text{Sr}/^{86}\text{Sr}$  value of 0.70914 during the course of the study (N=22, St. Error=0.00002).  
186 The laser was used to ablate a sampling transect from the core of the otolith section to the edge  
187 (30  $\mu\text{m/s}$  scan speed, 40  $\mu\text{m}$  spot size, 0.262 s integration speed,  $\sim 7$  J/cm). This resulted in a  
188 continuous time-series of  $^{87}\text{Sr}/^{86}\text{Sr}$  data from the birth of the fish (core) to its death (edge) which  
189 was used for subsequent analysis. For more detailed methods see Hegg et. al [40]. The asteriscus  
190 was used for one sample for which the lapilli were not available; however, the strontium  
191 concentration was low and the unreliable results were not included.

192

## 193 **Baseline Water Sampling and Prediction**

194 Twenty-four water sampling points located throughout the Amazon River basin (Figure  
195 1A) from three published studies provided baseline  $^{87}\text{Sr}/^{86}\text{Sr}$  values for our study (Table 2,  
196 Figure 3). Santos et al. [53] provided thirteen samples from the Ore-HYBAM project (

197 hybam.org), a multi-year research effort with a comprehensive sampling design covering the  
198 mainstem Amazon River and all of the major tributaries above Obidos, Brazil. Nine additional  
199 samples from Gaillardet et al. [52] covered the mainstem Amazon and the mouths of the major  
200 tributaries as far east as Santarem, Brazil. Finally, Queiroz et al. [51] provided two samples from  
201 the Lower Solimões and Upper Purus Rivers. Our intention was to include samples that  
202 represented all major Amazon tributaries at a regional scale, while excluding smaller tributaries  
203 that were unlikely to provide long-term habitat for our study species. Smaller tributaries in the  
204 Amazon Basin have been shown to exhibit much different isotopic chemistry from their  
205 mainstem rivers [51]. The scale and geologic heterogeneity of these smaller tributaries could  
206 jeopardize assignment accuracy [54].

207         The isotopic chemistry of a few significant locations were not available in the literature.  
208 Notably missing were samples from the mouth of the Amazon River, its tributaries below  
209 Obidos, and the Tocantins River which contributes to the estuary habitat of our study species. To  
210 account for the  $^{87}\text{Sr}/^{86}\text{Sr}$  of these locations we used the relationship between the geologic makeup  
211 of a watershed and its  $^{87}\text{Sr}/^{86}\text{Sr}$  signature to predict these points, following a similar regression  
212 approach to Hegg et al. [54]. Watersheds were delineated in qGIS (<http://www.qgis.org>), an  
213 open-source geographic information system, using the GRASS analysis plugin, which contains  
214 advanced watershed analysis tools from the open-source GRASS GIS platform  
215 (<http://grass.osgeo.org>). All analysis layers were procured from open-access datasets. Water  
216 sampling points were manually digitized by the authors based on location descriptions from  
217 Santos et al. [53], Gaillardet et al. [52], and Queiroz et al. [51]. Topography layers were taken  
218 from the GTOPO30 dataset [59] and stream courses from the HydroSHED dataset [60]. Geologic  
219 information came from the World Energy Assessment Geologic Map of the Amazon Region

220 [61].

221 We used geologic age as the primary candidate independent variables in our regression to  
222 predict the  $^{87}\text{Sr}/^{86}\text{Sr}$  signatures for unsampled tributaries, along with very general intrusive and  
223 extrusive rock-type categories (Figure 1B). Our methods differed from Hegg et al. [54], who  
224 used rock type as the primary explanatory variable rather than age. We did this because the very  
225 generic designations of intrusive or extrusive rock available in our dataset were insufficient to  
226 provide explanatory power. The values for these candidate variables were calculated by  
227 converting the geologic age codes from the map attribute table to continuous variables using the  
228 mean age (Ma) of the geologic periods encompassed by each code using the International  
229 Chronostratigraphic Chart [62]. The percentage area of each rock age and type was then  
230 calculated within the watershed upstream of each  $^{87}\text{Sr}/^{86}\text{Sr}$  sample point. The mean age of each  
231 watershed, weighted by area, was also included as a potential explanatory variable for the  
232 regression, leaving twenty-four potential explanatory variables for the regression.

233 Model selection used a genetic algorithm selection procedure in the `{glmulti}` package  
234 for R [63]. We limited models to four terms to limit the number of potential models and included  
235 interaction terms. The genetic algorithm uses a search algorithm based on Darwinian natural  
236 selection, an efficient method for model optimization when the number of potential models is  
237 large, as was the case with our geologic data [64]. Akaike's Information Criterion optimized for  
238 small datasets (AICc) was used as the optimization criteria for the genetic algorithm, a criterion  
239 that penalizes over-parameterization [65]. One third of the sample points were randomly selected  
240 as a validation set, withheld from the model selection procedure, and used to assess prediction  
241 accuracy of the best model. The best model was then used to calculate the  $^{87}\text{Sr}/^{86}\text{Sr}$  values for the  
242 unsampled points in the basin, using the geology upstream of these points.

243

## 244 **Grouping of Distinguishable Watersheds**

245         The water sample points were grouped into three distinguishable geographic regions  
246 using prior knowledge of the geography and geology of the watersheds (Table 1, Fig. 1A, Fig.  
247 3). River basins that were geographically contiguous and broadly geologically and chemically  
248 similar were grouped. The Amazon River mainstem and western tributaries, all considered  
249 whitewater rivers [26], were grouped together due to the overwhelming influence of the Andes  
250 on their chemistry. The Beni-Madeira River and lower Negro River were grouped due to similar  
251 chemical signatures from a mix of upland mountainous geology and old, lowland, Amazon and  
252 Guyana shield geology. The Negro River, being blackwater, would not be expected to contain  
253 large numbers of our target species, while the whitewater Madeira is a known fishery [23,26].  
254 The lower Amazon tributaries (below the Madeira River) were grouped due to their similarly  
255 old, shield geologies resulting in high  $^{87}\text{Sr}/^{86}\text{Sr}$  values. These rivers are all considered clearwater  
256 tributaries [26]. These group assignments were then used as the training set, with  $^{87}\text{Sr}/^{86}\text{Sr}$  as the  
257 predictor and group as the response, to create a quadratic discriminant function. This  
258 discriminant function was then used in the following section to classify the  $^{87}\text{Sr}/^{86}\text{Sr}$  signatures  
259 recovered from fish otoliths to these three distinguishable river groups.

260

## 261 **Determining Fish Movement and Location**

262         The transect of  $^{87}\text{Sr}/^{86}\text{Sr}$  values from the core to the rim of each otolith was analyzed  
263 using a PELT algorithm changepoint analysis (using the {changepoint} package in R [66]) to  
264 determine when the mean  $^{87}\text{Sr}/^{86}\text{Sr}$  values changed to a new stable signature. This changepoint

265 algorithm generated mean values and starting points for each stable region within the otolith  
266 transect using a penalty value of 0.0001 [67]. Each stable signature was assumed to correspond  
267 to movement into a new river signature, with the first stable signature corresponding to early  
268 rearing. In some cases the changepoint algorithm returned erroneous means for small portions of  
269 the signature, in locations where the means was obviously unstable. Such fragments were  
270 manually removed.

271 Stable otolith signatures were then classified to their likely location using the  
272 discriminant function developed from known and predicted water sampling points in the prior  
273 section. Because *a priori* probability of group membership was unknown, the prior probabilities  
274 for the discriminant function were set to be equal among groups. After classification, the results  
275 were plotted and the data were assessed to determine trends in early rearing and movement both  
276 within and among the three sampled species.

277

278

## 279 **Results**

280

### 281 **Baseline Water Sampling and Prediction**

282 The most parsimonious model without interaction terms explained ~80% of the variation  
283 in the data but provided an unreasonably high prediction for the mouth of the Amazon River. We  
284 had no direct evidence of significant geologic interactions; however, we included interactions in  
285 a second model selection exercise in hopes of finding a parsimonious model that better fit the  
286 available data. We limited the maximum number of model terms to four to limit the number of  
287 potential models available from the twenty-four available variables plus interactions. This limit

288 is reasonable since more terms would risk over parameterization given the number of  
289 observations used to build the model. Under these conditions the AICc model-selection  
290 algorithm selected three models that were greater than two AICc points superior to the next most  
291 parsimonious model. The top model,

292

$$\begin{aligned} {}^{87}\text{Sr}/{}^{86}\text{Sr} = & (0.0263)\text{Precambrian} - (0.676)\text{Precambrian:Tertiary} \\ & - (0.0011)\text{Mean Watershed Age}^{(\text{weighted by area})} + \varepsilon \end{aligned} \quad (1)$$

293

294 explained 89% (Adjusted R<sup>2</sup>) of the variation in the data, provided the best prediction residuals  
295 for the validation set, and resulted in a more reasonable prediction of the mouth of the Amazon.

296 This equation was used to predict the <sup>87</sup>Sr/<sup>86</sup>Sr signatures for the five unsampled watersheds.

297

## 298 **Grouping of Distinguishable Watersheds**

299 A quadratic discriminant function provided the best cross-validation error rate (3.6%) for  
300 discriminating all the watersheds into the three regions. One predicted value for the Madeira  
301 River was the lone misclassification from the validation set, being classified to the Lower  
302 Amazon Tributaries group. One sample from the Solimões River was dropped from the training  
303 set as an outlier (Table 2). The value for this site was unexplainably high in comparison to the  
304 multi-year samples above and below it on the river. While no explanation for this discrepancy  
305 was forthcoming from the original study, Bouchez et al. [68] found that lateral heterogeneity in  
306 <sup>87</sup>Sr/<sup>86</sup>Sr signatures can persist for long distances below confluences in the Solimões.

307

## 308 **Determining Fish Movement and Location**

309 Changes in  $^{87}\text{Sr}/^{86}\text{Sr}$  ratio, indicating movement, were common across each of the three  
310 species. Movement between distinguishable river groups, as determined by discriminant function  
311 classification, was less frequent. Over 70% of dourada exhibited movement between stable  
312 signatures based on changepoint analysis, however only two (14%) showed movement between  
313 distinguishable river groups after discriminant function classification (Figure 4A). Sample BR24  
314 started life in the Amazon Mainstem and Western Tributaries signature before moving to a  
315 signature consistent with the Lower Amazon Tributaries river group. Sample BR25 began life  
316 with a signature consistent with the Lower Amazon Tributaries river group, before moving twice  
317 to a signature consistent with the Beni-Madeira and Lower Negro group with a small region  
318 consistent with the Amazon Mainstem and Western Tributaries river group.

319 Of five piramutaba, two (40%) were shown to move between stable signatures but none  
320 moved outside the Amazon Mainstem and Western Tributaries river group based on discriminant  
321 function classification (Figure 4B). Of the three piraíba samples two showed movement, both of  
322 which moved between the Beni-Madeira and Lower Negro River group and the Amazon  
323 Mainstem and Western Tributaries (Figure 4C).

324 Overall, these results indicated that the majority of fish begin life in the Amazon  
325 Mainstem and Western Tributaries signature, a signature which contains within it the estuary  
326 signature, the expected location of early rearing [23]. Our results were unable to distinguish the  
327 Amazon mainstem signature from that of the estuary, the expected location of early rearing.  
328 However, we would expect the signature to be intermediate between that of the signature of the  
329 Amazon River mouth and the global marine signature of 0.70918 resulting from the mixing of  
330 the two water bodies. The resulting estuary signature would be contained within the range of the  
331 Amazon Mainstem and Western Tributaries classification.

332           Conversely, some portion of fish begin life, and undergo some or all of their rearing, in  
333 signatures indicative of freshwater (Figure 4A, B &C). Sample BR25 (dourada) and BF1  
334 (piraíba) were the two most obvious examples, starting life with signatures that correspond to the  
335 Beni-Madeira and Lower Negro and Lower Amazon Tributary signatures. Many of the fish that  
336 remained within the Amazon Mainstem and Western Tributaries river group began life with  
337 signatures  $> 0.71$ , significantly higher than the Mainstem Amazon River signatures (Table 2) and  
338 the global marine signature, and thus likely an upriver signature. Others (BR6, BR8, BV1, BF2)  
339 spent large portions of their lives in distinctly upriver environments.

340           Otolith microchemistry data is available in the supporting information for this publication  
341 (S1 Table).

342

343

## 344 **Discussion**

345

346           Understanding the migration ecology of Amazon catfish represents an opportunity to  
347 understand the large-scale ecosystem processes of long distance aquatic migration in an intact,  
348 native fish population. These fish also represent an international conservation challenge, as their  
349 movements stretch across multiple national boundaries [35] and are potentially threatened by  
350 several hydropower projects [16–19]. The first step in understanding these ecological processes,  
351 and their effects on the fishery, is a robust understanding of their migratory movements at a finer  
352 scale than is currently available from fisheries data.

353           Our results provide the first reported reconstruction of movements and migrations of  
354 individual *Brachyplatystoma* spp. in the Amazon Basin using chemical signatures from otoliths.



355 Applying these techniques in this system appears promising for improving our understanding of  
356 the migratory movements of these species, which are currently understood only at the most basic  
357 level. While this work is preliminary,  $^{87}\text{Sr}/^{86}\text{Sr}$  signatures appear capable of identifying large-  
358 scale fish movements at a meaningful spatial scale; between important river systems within the  
359 basin. Further, movement between areas with stable signatures can be observed within  
360 statistically distinguishable river groups, indicating that improved baselines and larger sample  
361 collections should allow greater resolution. Discrimination of fish location and movement may  
362 also be improved by applying multivariate analyses of elemental signatures in concert with  
363  $^{87}\text{Sr}/^{86}\text{Sr}$  signatures [69–71].

364 We observed diversity in rearing location and behavior among a minority of individuals  
365 in each of the three species sampled using otolith  $^{87}\text{Sr}/^{86}\text{Sr}$  movement reconstructions and  
366 discriminant function classification to location. For example, fish BR25 (a dourada caught in  
367 Manaus) appears to have spent most of its early life in areas with very high  $^{87}\text{Sr}/^{86}\text{Sr}$  ratios  
368 assigned to the Lower Amazon Tributaries river group (Figure 4A). The chemical signatures of  
369 this fish indicate that rather than drifting to the estuary to rear, it spent the first third of its life in  
370 a lower tributary of the Amazon River before moving to a signature indicative of areas between  
371 the Madeira and Amazon Rivers, finally being caught near between Manaus and the mouth of the  
372 Madeira (as reported by the fishermen who provided the samples in Manaus). Notably, the  
373 signatures appear to support the idea that this fish never traveled to the estuary. Fish BF1  
374 (piraíba) also showed a significant length of freshwater rearing in a signature assigned to the  
375 Beni-Madeira and Lower Negro river group (Figure 4C).

376 Indeed, several additional dourada and piraíba, and one piramutaba all appeared to have  
377 spent significant time in  $^{87}\text{Sr}/^{86}\text{Sr}$  signatures greater than 0.7100 (Figure 4A, B & C). This

378 signature is higher than all but one location on the mainstem Amazon River and significantly  
379 higher than the accepted global marine signature of 0.70918 considering the analytical precision  
380 that is possible for otolith measurements. We would expect estuarine signatures to fall between  
381 the  $^{87}\text{Sr}/^{86}\text{Sr}$  signature of the Amazon mouth and the global marine signature except very near the  
382 mouth of the Tocantins. The Tocantins signature is likely attenuated significantly by Amazon  
383 River water flowing through the Canal de Breves which noticeably muddies the water flowing  
384 from the Tocantins [23]. Further, the estuary signature should converge to the marine signature at  
385 relatively low salinities due to the much higher strontium concentration of the ocean [72]. This  
386 indicates the possibility that a larger percentage of our samples may have reared upriver of the  
387 estuary as well, but our methods were unable to detect it.

388         Ecologically, the presence of upriver  $^{87}\text{Sr}/^{86}\text{Sr}$  signatures during the rearing phase  
389 indicates that in some situations a rearing strategy that forgoes the high growth potential of the  
390 estuary may provide overall fitness benefits. This finding suggests that the life-history of these  
391 species is more complex than has been previously understood. The potential existence of a  
392 freshwater rearing life-history, based on evidence for alternative spawning periods in the upper  
393 reaches which do not fit the conventional estuary rearing model, was theorized by García  
394 Vasquez et al. [33]. This model is supported by evidence of young and immature fish present in  
395 the far western Amazon before and during the spawning season when the prevailing hypothesis  
396 would place these fish in the estuary [24,35,36].

397         Understanding the extent of diversity in life history strategies is critical for managing  
398 these little-studied native species, especially in habitats facing current and future perturbations.  
399 Variations in life history have been shown to affect recruitment, survival, and fisheries  
400 sustainability in other long-distance migratory fish [73–75]. These species may home to their

401 natal rivers, and sub-population structure and associated differences in life history may exist  
402 [37,38], which may have important implications for planning and policy decisions related to dam  
403 placement and fishery management. For instance, fishing pressure in the estuary is high,  
404 potentially limiting juvenile escapement to upriver fisheries [24,35]. Freshwater rearing life-  
405 histories would avoid the high fishing pressures in the estuary, potentially increasing survival  
406 and providing important recruitment to upriver fisheries in the Western Amazon, fisheries which  
407 appear to be overfished [24,25,31].

408 Dams in particular have been shown to decrease life-history diversity of other major  
409 migratory fisher species, with consequences for their conservation and fisheries sustainability  
410 [76,77] and diverse source populations appear to provide resilient fisheries over time [74]. So,  
411 the extent to which dams or other anthropogenic disturbances decrease the diversity of source  
412 populations in dourada, piramutaba, and piraíba could have adverse impacts on the sustainability  
413 of the fishery. The pace of dam building in the major Amazon Basin tributaries [16,17,19]; the  
414 difficulty of providing significant fish passage in Amazonian rivers [21]; and the known and  
415 suspected effects of dams on the migration of these migratory catfish species [6,29,78] increase  
416 the need to understand the details of their migration ecology. Only with detailed knowledge of  
417 *Brachyplatystoma* migration ecology can policymakers weigh the effects of dams on the  
418 sustainability of this important fishery.

419 Our study raises numerous important questions and opportunities for future research.  
420 While it is clear that water chemistry signatures for the Amazon basin can be classified into  
421 meaningful groups, such results do not necessarily translate into concrete interpretation of fish  
422 movement at anything but the largest of scales. Our understanding of the degree to which the  
423 movements and migrations of individual fish can be interpreted at the scale of the entire Amazon

424 basin is in its infancy. At smaller spatial scales, many of the local tributaries to the major rivers  
425 of the Amazon basin exhibit vastly different signatures than those of the main channels, which  
426 reflect the headwater signature of the Andes or the Brazilian and Guyana Shield geology [51].  
427 Incomplete or slow mixing of different signatures, especially across muddy whitewater and  
428 tannic blackwater rivers, may occur over extended river distances, which may create unexpected  
429 intermediate signatures [68]. Furthermore, our understanding of temporal variation associated  
430 with available empirical data is limited. Especially in the Amazon estuary our understanding of  
431 the  $^{87}\text{Sr}/^{86}\text{Sr}$  signatures in this seasonally dynamic environment are limited. Increased  
432 understanding of these estuarian signatures is critically important to understanding these species  
433 using otolith microchemistry studies. Our study species are thought to inhabit only the larger,  
434 mainstem tributaries, making large scale location classification useful. At smaller geographic  
435 scales additional ground truth sampling of fish and water chemistry is needed to constrain the  
436 scale at which movements and migrations can be accurately interpreted from otolith data. Otolith  
437 sampling across larger areas of the Amazon may also allow elemental ratios, which are  
438 fractionated biologically unlike  $^{87}\text{Sr}/^{86}\text{Sr}$ , to be used in addition to  $^{87}\text{Sr}/^{86}\text{Sr}$  to improve location  
439 analysis.

440 Overall, this study highlights the feasibility and utility of the latest otolith chemistry  
441 techniques to greatly improve our understanding of the movements and ecology of these  
442 important native fishes throughout the entire Amazon basin. Recent declines in the fishery point  
443 to the necessity of conducting this research [22,28,79]. Migratory catfish in the Amazon Basin  
444 are several of only a few large, freshwater fishes worldwide that are not currently imperiled due  
445 to anthropogenic changes to freshwater ecosystems [12]. However, as fishing pressure increases,  
446 land use and forest clearing affect the river system, and dams threaten migration routes and

447 access to critical habitats, these populations will likely be affected. The sustainability of these  
448 populations and the fisheries they support, especially across international borders, continues to  
449 depend on accurate population assessments of based on detailed knowledge of their behavior and  
450 ecology.

451

452

## 453 **Acknowledgements**

454 Thanks to A. Fremier and P. Anders for their encouragement and help in framing the project at  
455 the earliest stages, as well as sharp outside editing. Thanks to C. Cooper for editing and moral  
456 support. Thanks to L. Rayala for applying his practiced editing eye. Thank you to Z. Hogan for  
457 providing constructive feedback on the project proposal. Thanks to M. Andrade, A. Zuluaga and  
458 D. Bastos for help with sample collection in Manaus and Belém, as well as to the fishermen who  
459 volunteered their catch for sampling. Thanks to J. Vervoort and C. Knaack at the Washington  
460 State University Geoanalytical Laboratory for use of their equipment for isotopic analysis. T.  
461 Giarrizzo received a productivity grant from CNPq (process: 308278/2012-7), and was funded  
462 by CAPES (PNPD and Pró-Amazônia: biodiversidade e sustentabilidade).

463

464

465

466

## 467 **References Cited**

468

469 1. Bauer S, Hoyer BJ (2014) Migratory Animals Couple Biodiversity and Ecosystem Functioning  
470 Worldwide. *Science* (80- ) 344: 54–54(8). Available:

471 <http://www.sciencemag.org/cgi/doi/10.1126/science.1242552>. Accessed 3 April 2014.

472

473 2. Bowlin MS, Bisson I-A, Shamoun-Baranes J, Reichard JD, Sapir N, et al. (2010) Grand  
474 challenges in migration biology. *Integr Comp Biol* 50: 261–279. Available:

475 <http://www.ncbi.nlm.nih.gov/pubmed/21558203>. Accessed 30 April 2014.

476

477 3. Poiani K a., Richter BD, Anderson MG, Richter HE (2000) Biodiversity Conservation at  
478 Multiple Scales: Functional Sites, Landscapes, and Networks. *Bioscience* 50: 133. Available:

479 <http://bioscience.oxfordjournals.org/cgi/doi/10.1641/0006->

480 [3568\(2000\)050\[0133:BCAMSF\]2.3.CO;2](http://bioscience.oxfordjournals.org/cgi/doi/10.1641/0006-3568(2000)050[0133:BCAMSF]2.3.CO;2).

481

482 4. Webster MS, Marra PP, Haig SM, Bensch S, Holmes RT (2002) Links between worlds:  
483 unraveling migratory connectivity. *Trends Ecol Evol* 17: 76–83. Available:

484 <http://linkinghub.elsevier.com/retrieve/pii/S0169534701023801>.

485

486 5. Wilcove DS, Wikelski M (2008) Going, going, gone: is animal migration disappearing. *PLoS*  
487 *Biol* 6: e188. Available:

488 [http://www.pubmedcentral.nih.gov/articlerender.fcgi?artid=2486312&tool=pmcentrez&renderty](http://www.pubmedcentral.nih.gov/articlerender.fcgi?artid=2486312&tool=pmcentrez&rendertype=abstract)  
489 [pe=abstract](http://www.pubmedcentral.nih.gov/articlerender.fcgi?artid=2486312&tool=pmcentrez&rendertype=abstract). Accessed 15 May 2014.

490

491 6. Freeman BJB (2003) Ecosystem-Level Consequences of Migratory Faunal Depletion Caused  
492 by Dams. *Am Fish Soc Symp* 35: 255–266. Available:

493 <http://www.esf.edu/efb/limburg/watershedEcology/Readings/Freeman-dams.pdf>.

494

495 7. Dudgeon D, Arthington AH, Gessner MO, Kawabata Z-I, Knowler DJ, et al. (2006)  
496 Freshwater biodiversity: importance, threats, status and conservation challenges. *Biol Rev Camb*

497 *Philos Soc* 81: 163–182. Available: <http://www.ncbi.nlm.nih.gov/pubmed/16336747>. Accessed

498 29 April 2014.

499

500 8. Tockner K, Pusch M, Gessner J, Wolter C (2011) Domesticated ecosystems and novel  
501 communities: challenges for the management of large rivers. *Ecohydrol Hydrobiol* 11: 167–174.

502 Available: <http://linkinghub.elsevier.com/retrieve/pii/S1642359311700131>. Accessed 5 May

503 2014.

504

505 9. Rosenberg DM, Mccully P, Pringle CM (2000) Global-Scale Environmental Effects of  
506 Hydrological Alterations: Introduction. *Bioscience* 50: 746. Available:

507 <http://bioscience.oxfordjournals.org/cgi/doi/10.1641/0006->

508 [3568\(2000\)050\[0746:GSEEOH\]2.0.CO;2](http://bioscience.oxfordjournals.org/cgi/doi/10.1641/0006-3568(2000)050[0746:GSEEOH]2.0.CO;2). Accessed 19 May 2014.

509

510 10. Foley JA, DeFries R, Asner GP, Barford C, Bonan G, et al. (2005) Global consequences of  
511 land use. *Science* (80- ) 309: 570.

512

- 513 11. Carpenter SR, Stanley EH, Vander Zanden MJ (2011) State of the World's Freshwater  
514 Ecosystems: Physical, Chemical, and Biological Changes. *Annu Rev Environ Resour* 36: 75–99.  
515 Available: <http://www.annualreviews.org/doi/abs/10.1146/annurev-environ-021810-094524>.  
516 Accessed 21 March 2014.  
517
- 518 12. Allan JD, Abell R, Hogan Z, Revenga C, Taylor BW, et al. (2005) Overfishing of Inland  
519 Waters. *Bioscience* 55: 1041. Available:  
520 [http://bioscience.oxfordjournals.org/cgi/doi/10.1641/0006-](http://bioscience.oxfordjournals.org/cgi/doi/10.1641/0006-3568(2005)055[1041:OOIW]2.0.CO;2)  
521 [3568\(2005\)055\[1041:OOIW\]2.0.CO;2](http://bioscience.oxfordjournals.org/cgi/doi/10.1641/0006-3568(2005)055[1041:OOIW]2.0.CO;2).  
522
- 523 13. Pikitch EK, Doukakis P, Lauck L, Chakrabarty P, Erickson DL (2005) Status, trends and  
524 management of sturgeon and paddlefish fisheries. *Fish Fish* 6: 233–265. Available:  
525 <http://doi.wiley.com/10.1111/j.1467-2979.2005.00190.x>.  
526
- 527 14. Stone R (2007) The last of the leviathans. *Science* (80- ) 316: 1684. Available:  
528 <http://www.sciencemag.org/content/316/5832/1684.short>. Accessed 30 May 2014.  
529
- 530 15. Dudgeon D (2011) Asian river fishes in the Anthropocene: threats and conservation  
531 challenges in an era of rapid environmental change. *J Fish Biol* 79: 1487–1524. Available:  
532 <http://www.ncbi.nlm.nih.gov/pubmed/22136237>. Accessed 15 May 2014.  
533
- 534 16. Fearnside PM (2006) Dams in the Amazon : Belo Monte and Brazil's Hydroelectric  
535 Development of the Xingu River Basin. *Environ Manage* 38: 16–27.  
536
- 537 17. Fearnside PM (2014) Impacts of Brazil's Madeira River Dams: Unlearned lessons for  
538 hydroelectric development in Amazonia. *Environ Sci Policy* 38: 164–172. Available:  
539 <http://www.sciencedirect.com/science/article/pii/S1462901113002724>. Accessed 12 May 2014.  
540
- 541 18. Tavener B (2012) New Dams Planned for Heart of Amazon. *Rio Times*. Available:  
542 <http://riotimesonline.com/brazil-news/rio-politics/new-dams-planned-for-heart-of-amazon/>.  
543
- 544 19. Finer M, Jenkins CN (2012) Proliferation of hydroelectric dams in the Andean Amazon and  
545 implications for Andes-Amazon connectivity. *PLoS One* 7: e35126. Available:  
546 [http://www.pubmedcentral.nih.gov/articlerender.fcgi?artid=3329437&tool=pmcentrez&renderty](http://www.pubmedcentral.nih.gov/articlerender.fcgi?artid=3329437&tool=pmcentrez&rendertype=abstract)  
547 [pe=abstract](http://www.pubmedcentral.nih.gov/articlerender.fcgi?artid=3329437&tool=pmcentrez&rendertype=abstract). Accessed 1 May 2014.  
548
- 549 20. Forero J (2013) Power-hungry Brazil builds dams, and more dams, across the Amazon.  
550 *Washington Post*. Available: [http://www.washingtonpost.com/world/the\\_americas/brazil-](http://www.washingtonpost.com/world/the_americas/brazil-building-more-dams-across-amazon/2013/02/09/f23a63ca-6fba-11e2-b35a-0ee56f0518d2_story.html)  
551 [building-more-dams-across-amazon/2013/02/09/f23a63ca-6fba-11e2-b35a-](http://www.washingtonpost.com/world/the_americas/brazil-building-more-dams-across-amazon/2013/02/09/f23a63ca-6fba-11e2-b35a-0ee56f0518d2_story.html)  
552 [0ee56f0518d2\\_story.html](http://www.washingtonpost.com/world/the_americas/brazil-building-more-dams-across-amazon/2013/02/09/f23a63ca-6fba-11e2-b35a-0ee56f0518d2_story.html). Accessed 20 May 2014.  
553
- 554 21. Pompeu PS, Agostinho AA, Pelicice FM (2012) Existing and Future Challenges : The  
555 Concept of Successful Fish Passage in South America. *River Res Appl* 512: 504–512.  
556 doi:10.1002/rra.  
557

- 558 22. Petrere M, Barthem RB, Córdoba EA, Gómez BC (2005) Review of the large catfish  
559 fisheries in the upper Amazon and the stock depletion of piraíba (*Brachyplatystoma*  
560 *filamentosum* Lichtenstein). Rev Fish Biol Fish 14: 403–414. Available:  
561 <http://link.springer.com/10.1007/s11160-004-8362-7>. Accessed 4 April 2014.  
562
- 563 23. Barthem R, Goulding M (1997) The Catfish Connection: Ecology, Migration, and  
564 Conservation of Amazon Predators. New York: Columbia University Press. 144 p.  
565
- 566 24. Fabrè NN, Barthem RB (2005) O manejo da pesca dos grandes bagres migradores:  
567 Piramutaba e Dourada no Eixo Solimões-Amazonas. Ruffino ML, editor Manaus, Amazonas,  
568 Brazil: ProVárzea/Ibama. 116 p. Available: <http://www.ibcperu.org/doc/isis/6464.pdf>.  
569
- 570 25. Sioli H (1956) As águas da região do alto Rio Negro [Biologia aquática; Física da água;  
571 Química da água; Hidrogeologia; Hidrografia; Amazonia; Brasil]. Bol Técnico Inst Agrônômico  
572 do Norte 32: 117–155.  
573
- 574 26. Junk WJ, Piedade MTF, Schöngart J, Cohn-Haft M, Adeney JM, et al. (2011) A  
575 Classification of Major Naturally-Occurring Amazonian Lowland Wetlands. Wetlands 31: 623–  
576 640. Available: <http://link.springer.com/10.1007/s13157-011-0190-7>. Accessed 27 May 2014.  
577
- 578 27. Angelini R, Fabrè NN, Silva-jr UL (2006) Trophic analysis and fishing simulation of the  
579 biggest Amazonian catfish. J Agric Res 1: 151–158.  
580
- 581 28. Córdoba EA, Viviana Á, León J, Bonilla-castillo CA, Junior MP, et al. (2013) Breeding ,  
582 growth and exploitation of *Brachyplatystoma rousseauxii* Castelnau , 1855 in the Caqueta River ,  
583 Colombia. Neotrop Ichthyology 11: 637–647. Available: [http://www.scielo.br/pdf/ni/v11n3/1679-  
584 6225-ni-11-03-00637.pdf](http://www.scielo.br/pdf/ni/v11n3/1679-6225-ni-11-03-00637.pdf).  
585
- 586 29. Barthem B, Ribeiro M, Petrere M (1991) Life strategies of some long-distance migratory  
587 catfish in relation to hydroelectric dams in the Amazon Basin. Biol Conserv 55: 339–345.  
588
- 589 30. Jimenez EA, Filho MA, Frédou FL (2013) Fish Bycatch of the Laulao catfish  
590 *Brachyplatystoma vaillantii* (Valenciennes, 1840) Trawl Fishery in the the Amazon Basin.  
591 Brazilian J Oceanogr 61: 129–140. doi:<http://dx.doi.org/10.1590/S1679-87592013000200005>.  
592
- 593 31. Barthem RB, Petrere Jr M (1995) Fisheries and population dynamics of *Brachyplatystoma*  
594 *vaillantii* (Pimelodidae) in the Amazon Estuary. In: Armantrout NB, Wolotira R, editors.  
595 Proceedings of the World Fisheries Congress, Theme 1. Condition of the World's Aquatic  
596 Habitats. New Delhi, India: Oxford and IBH Publishing Co. Pvt. Ltd., Vol. 1. pp. 329–340.  
597
- 598 32. Godoy MP (1979) Marcação e migração de piramutaba *Brachyplatystoma vaillanti* (Val.,  
599 1840. na Bacia Amazonica (Pará e Amazonas), Brasil (Pisces, Nematognathi, Pimelodidae). Bol  
600 Fac Ciências do Pará, Belém 11: 3–21.  
601
- 602 33. García Vásquez A, Alonso J-C, Carvajal F, Moreau J, Nuñez J, et al. (2009) Life-history  
603 characteristics of the large Amazonian migratory catfish *Brachyplatystoma rousseauxii* in the



- 604 Iquitos region, Peru. *J Fish Biol* 75: 2527–2551. Available:  
605 <http://ida.lib.uidaho.edu:3278/doi/10.1111/j.1095-8649.2009.02444.x/full>. Accessed 7 November  
606 2013.  
607
- 608 34. Pirker LEM (2008) Morfometria e Descrição de Otólitos Dourada (*Brachyplatystoma*  
609 *rousseauxii*) (Castelnaud, 1855) e de Piramutaba (*B. vaillantii*) (Valenciennes,  
610 1840)(Siluriformes: Pimelodidae) e Verificação de Anéis de Crescimento em Otólitos de  
611 Juvenis de Dourada e de Pirimut Museu Paraense Emílio Goeldi - Universidade Federal Do Pará.  
612 Available:  
613 [http://repositorio.ufpa.br/jspui/bitstream/2011/3445/1/Tese\\_MorfometriaDescricaoOtolitos.pdf](http://repositorio.ufpa.br/jspui/bitstream/2011/3445/1/Tese_MorfometriaDescricaoOtolitos.pdf).  
614
- 615 35. Agudelo E, Salinas Y, Sanchez CL, Munoz\_Sosa DL, Alonso JC, et al. (2000) Bagres de la  
616 Amazonia Colombiana: un Recurso sin Fronteras. Santa Fé de Bogota D.C., Columbia: Editorial  
617 Scripto Ltda. 253 p. Available: [http://www.sidalc.net/cgi-](http://www.sidalc.net/cgi-bin/wxis.exe/?IsisScript=BAC.xis&method=post&formato=2&cantidad=1&expresion=mf=025972)  
618 [bin/wxis.exe/?IsisScript=BAC.xis&method=post&formato=2&cantidad=1&expresion=mf=025](http://www.sidalc.net/cgi-bin/wxis.exe/?IsisScript=BAC.xis&method=post&formato=2&cantidad=1&expresion=mf=025972)  
619 [972](http://www.sidalc.net/cgi-bin/wxis.exe/?IsisScript=BAC.xis&method=post&formato=2&cantidad=1&expresion=mf=025972).  
620
- 621 36. Alonso JC, Fabr e NN (2002) Padr o espa o-temporal da estrutura populacional e estado  
622 atual de explora o pesqueira da dourada *Brachyplatystoma flavicans*, Castelnaud, 1855  
623 (Siluriformes: Pimelodidae), no sistema estu rio-Amazonas-Solim es Manaus: Universidade  
624 Federal do Amazonas.  
625
- 626 37. Batista JS, Alves-Gomes JA (2006) Phylogeography of *Brachyplatystoma rousseauxii*  
627 (Siluriformes - Pimelodidae) in the Amazon Basin offers preliminary evidence for the first case  
628 of “homing” for an Amazonian migratory catfish. *Genet Mol Res* 5: 723–740.  
629
- 630 38. Carvajal F (2013) Phylogeny and population genetics of the fish performing the largest  
631 migratin known in freshwater, the Amazonian catfish “*Brachyplatystoma rousseauxii*” :  
632 revelations from the upper Madera Basin Montpellier 2. Available: [http://www.biu-](http://www.biu-montpellier.fr/florabium/jsp/nnt.jsp?nnt=2012MON20149)  
633 [montpellier.fr/florabium/jsp/nnt.jsp?nnt=2012MON20149](http://www.biu-montpellier.fr/florabium/jsp/nnt.jsp?nnt=2012MON20149). Accessed 30 May 2014.  
634
- 635 39. Hamann EJ, Kennedy BP (2012) Juvenile dispersal affects straying behaviors of adults in a migratory  
636 population. *Ecology* 93: 733–740.  
637
- 638 40. Hegg JC, Kennedy BP, Chittaro PM, Zabel RW (2013) Spatial structuring of an evolving  
639 life-history strategy under altered environmental conditions. *Oecologia* 172: 1017–1029.  
640 Available: <http://dx.doi.org/10.1007/s00442-012-2564-9>. Accessed 12 April 2013.  
641
- 642 41. Hogan Z, Baird IG, Radtke R, Vander Zanden MJ (2007) Long distance migration and  
643 marine habitation in the tropical Asian catfish, *Pangasius krempfi*. *J Fish Biol* 71: 818–832.  
644
- 645 42. Thorrold SR, Latkoczy C, Swart PK, Jones CM (2001) Natal homing in a marine fish  
646 metapopulation. *Science* (80- ) 291: 297–299.  
647
- 648 43. Kennedy BP, Klaue A, Blum JD, Folt CL, Nislow KH (2002) Reconstructing the lives of fish  
649 using Sr isotopes in otoliths. *Can J Fish Aquat Sci* 59: 925–929.  
650

- 651 44. Walther BD, Dempster T, Letnic M, McCulloch MT (2011) Movements of diadromous fish  
652 in large unregulated tropical rivers inferred from geochemical tracers. PLoS One 6.  
653 doi:10.1371/journal.pone.0018351.  
654
- 655 45. Garcez RCS, Humston R, Harbor D, Freitas CEC (2014) Otolith geochemistry in young-of-  
656 the-year peacock bass *Cichla temensis* for investigating natal dispersal in the Rio Negro  
657 (Amazon - Brazil) river system. Ecol Freshw Fish: n/a – n/a. Available:  
658 <http://doi.wiley.com/10.1111/eff.12142>. Accessed 29 April 2014.  
659
- 660 46. Collins SM, Bickford N, McIntyre PB, Coulon A, Ulseth AJ, et al. (2013) Population  
661 Structure of a Neotropical Migratory Fish: Contrasting Perspectives from Genetics and Otolith  
662 Microchemistry. Trans Am Fish Soc 142: 1192–1201. Available:  
663 <http://www.tandfonline.com/doi/abs/10.1080/00028487.2013.804005>. Accessed 11 April 2014.  
664
- 665 47. Hobson KA, Barnett-Johnson R, Cerling T (2010) Using isoscapes to track animal migration.  
666 Isoscapes: understanding movement, pattern, and process on Earth through isotope mapping.  
667 Springer Verlag. pp. 273–298.  
668
- 669 48. Kennedy BP, Blum JD, Folt CL, Nislow KH (2000) Using natural strontium isotopic  
670 signatures as fish markers: methodology and application. Can J Fish Aquat Sci 57: 2280–2292.  
671
- 672 49. Kennedy BP, Folt CL, Blum JD, Chamberlain CP (1997) Natural isotope markers in salmon.  
673 Nature 387: 766–767.  
674
- 675 50. Barnett-Johnson R, Pearson TE, Ramos FC, Grimes CB, MacFarlane RB (2008) Tracking  
676 natal origins of salmon using isotopes, otoliths, and landscape geology. Limnol Oceanogr 53:  
677 1633–1642.  
678
- 679 51. Queiroz MMA, Horbe AMC, Seyler P, Moura CAV (2009) Hidroquímica do rio Solimões na  
680 região entre Manacapuru e Alvarães: Amazonas - Brasil. Acta Amaz 39: 943–952. Available:  
681 [http://www.scielo.br/scielo.php?script=sci\\_arttext&pid=S0044-  
682 59672009000400022&lng=en&nrm=iso&tlng=ES](http://www.scielo.br/scielo.php?script=sci_arttext&pid=S0044-59672009000400022&lng=en&nrm=iso&tlng=ES). Accessed 23 January 2014.  
683
- 684 52. Gaillardet J, Dupre B, Allegre CJ, Négrel P (1997) Chemical and physical denudation in the  
685 Amazon River Basin. Chem Geol 142: 141–173.  
686
- 687 53. Santos R V., Sondag F, Cochonneau G, Lagane C, Brunet P, et al. (2013) Source area and  
688 seasonal  $^{87}\text{Sr}/^{86}\text{Sr}$  variations in rivers of the Amazon basin. Hydrol Process: n/a – n/a. Available:  
689 <http://doi.wiley.com/10.1002/hyp.10131>. Accessed 27 January 2014.  
690
- 691 54. Hegg JC, Kennedy BP, Fremier AK (2013) Predicting strontium isotope variation and fish  
692 location with bedrock geology: Understanding the effects of geologic heterogeneity. Chem Geol  
693 360-361: 89–98. Available:  
694 <http://ida.lib.uidaho.edu:2104/science/article/pii/S0009254113004464#>. Accessed 4 November  
695 2013.  
696

- 697 55. Bataille CP, Bowen GJ (2012) Mapping  $^{87}\text{Sr}/^{86}\text{Sr}$  variations in bedrock and water for large  
698 scale provenance studies. *Chem Geol* 304: 39–52.  
699
- 700 56. Pirker LEM (2001) Determinação da idade e crescimento da Piramutaba *Brachyplatystoma*  
701 *vallantii* (Valenciennes, 1840) (Siluriformes: Pimilodidae) capturada no estuário Amazônico  
702 Universidade Federal do Pará/Museo Paraense Emílio Goeldi. Available:  
703 [http://www.repositorio.ufpa.br/jspui/bitstream/2011/4153/1/Dissertacao\\_DeterminacaoIdadeCres-](http://www.repositorio.ufpa.br/jspui/bitstream/2011/4153/1/Dissertacao_DeterminacaoIdadeCrescimento.pdf)  
704 [cimento.pdf](http://www.repositorio.ufpa.br/jspui/bitstream/2011/4153/1/Dissertacao_DeterminacaoIdadeCrescimento.pdf).  
705
- 706 57. Secor DH, Dean JM, Laban EH (1991) Manual for otolith removal and preparation for  
707 microstructural examination. 1: 85. Available:  
708 <http://www.cbl.umces.edu/~secor/manual/manual.pdf>.  
709
- 710 58. Faure G, Mensing TM (2004) *Isotopes: principles and applications*. John Wiley & Sons Inc.  
711
- 712 59. USGS (1996) GTOPO30 30-Arc-Second Elevation Data Set of South America. Sioux Falls,  
713 South Dakota: United States Geological Survey. Available: <https://lta.cr.usgs.gov/GTOPO30>.  
714
- 715 60. Lehner B, Verdin K, Jarvis A (2008) New global hydrography derived from spaceborne  
716 elevation data. *Eos (Washington DC)* 89: 93–94.  
717
- 718 61. USGS (1999) *Geologic Map of the Amazon Region*. Denver, Colorado: United States  
719 Geological Survey. Available: <http://energy.cr.usgs.gov/energy/WorldEnergy/WEnergy.html>.  
720
- 721 62. Cohen KM, Finney S, Bibbard PL (2013) *International Chronostratigraphic Chart*.  
722 International Commission on Stratigraphy.  
723
- 724 63. Calcagno V, Mazancourt C de (2010) glmulti: an R package for easy automated model  
725 selection with (generalized) linear models. *J Stat Softw* 34. Available:  
726 [http://www.researchgate.net/publication/215991965\\_glmulti\\_An\\_R\\_Package\\_for\\_Easy\\_Autom-](http://www.researchgate.net/publication/215991965_glmulti_An_R_Package_for_Easy_Automated_Model_Selection_with_Generalized_Linear_Models/file/e0b4952a1b23cf2236.pdf)  
727 [ated\\_Model\\_Selection\\_with\\_\(Generalized\)\\_Linear\\_Models/file/e0b4952a1b23cf2236.pdf](http://www.researchgate.net/publication/215991965_glmulti_An_R_Package_for_Easy_Automated_Model_Selection_with_Generalized_Linear_Models/file/e0b4952a1b23cf2236.pdf).  
728 Accessed 28 November 2014.  
729
- 730 64. Tang KS, Man KF, Kwong S, He Q (1996) Genetic algorithms and their applications. *IEEE*  
731 *Signal Process Mag* 13: 22–37. Available:  
732 [http://ieeexplore.ieee.org/xpls/abs\\_all.jsp?arnumber=543973](http://ieeexplore.ieee.org/xpls/abs_all.jsp?arnumber=543973). Accessed 28 November 2014.  
733
- 734 65. Burnham KP, Anderson DR (2002) *Model selection and multimodel inference: a practical*  
735 *information-theoretic approach*. Springer Verlag.  
736
- 737 66. Killick R, Eckley IA (2013) *Changepoint: An R Package for changepoint analysis*. R Packag  
738 version 06, URL <http://CRANR-project.org/package=changepoint>: 1–15. Available:  
739 <http://www.lancs.ac.uk/~killick/Pub/KillickEckley2011.pdf>.  
740
- 741 67. Killick R, Fearnhead P, Eckley I (2012) Optimal detection of changepoints with a linear  
742 computational cost. *J Am ...* 107: 1–25. Available:

- 743 <http://www.tandfonline.com/doi/abs/10.1080/01621459.2012.737745>. Accessed 30 May 2014.  
744
- 745 68. Bouchez J, Lajeunesse E, Gaillardet J, France-Lanord C, Dutra-Maia P, et al. (2010)  
746 Turbulent mixing in the Amazon River: The isotopic memory of confluences. *Earth Planet Sci*  
747 *Lett* 290: 37–43. Available: <http://linkinghub.elsevier.com/retrieve/pii/S0012821X0900716X>.  
748 Accessed 2 February 2014.  
749
- 750 69. Crook DA, Macdonald JI, McNeil DG, Gilligan DM, Asmus M, et al. (2013) Recruitment  
751 sources and dispersal of an invasive fish in a large river system as revealed by otolith chemistry  
752 analysis. *Can J Fish Aquat Sci* 70: 953–963. Available:  
753 <http://www.nrcresearchpress.com/doi/abs/10.1139/cjfas-2012-0504#.U1ha9P12Vy4>. Accessed  
754 24 April 2014.  
755
- 756 70. Hughes JM, Schmidt DJ, Macdonald JI, Huey JA, Crook DA (2014) Low interbasin  
757 connectivity in a facultatively diadromous fish: evidence from genetics and otolith chemistry.  
758 *Mol Ecol* 23: 1000–1013. Available: <http://www.ncbi.nlm.nih.gov/pubmed/24410817>. Accessed  
759 24 April 2014.  
760
- 761 71. Muhlfeld CC, Thorrold SR, McMahon TE, Marotz B, Gillanders B (2012) Estimating  
762 westslope cutthroat trout (*Oncorhynchus clarkii lewisi*) movements in a river network using  
763 strontium isoscapes. *Can J Fish Aquat Sci* 69: 906–915.  
764
- 765 72. Hobbs JA, Lewis LS, Ikemiyagi N, Sommer T, Baxter RD (2010) The use of otolith  
766 strontium isotopes ( $^{87}\text{Sr}/^{86}\text{Sr}$ ) to identify nursery habitat for a threatened estuarine fish. *Environ*  
767 *Biol Fishes* 89: 557–569. Available: [http://link.springer.com/article/10.1007/s10641-010-9672-](http://link.springer.com/article/10.1007/s10641-010-9672-3/fulltext.html)  
768 [3/fulltext.html](http://link.springer.com/article/10.1007/s10641-010-9672-3/fulltext.html). Accessed 3 December 2014.  
769
- 770 73. Winemiller KO (2005) Life history strategies , population regulation , and implications for  
771 fisheries management. *Can J Fish Aquat Sci* 885: 872–885. doi:10.1139/F05-040.  
772
- 773 74. Hilborn R, Quinn TP, Schindler DE, Rogers DE (2003) Biocomplexity and fisheries  
774 sustainability. *Proc Natl Acad Sci U S A* 100: 6564–6568. Available:  
775 <http://www.pubmedcentral.nih.gov/articlerender.fcgi?artid=164486&tool=pmcentrez&rendertyp>  
776 [e=abstract](http://www.pubmedcentral.nih.gov/articlerender.fcgi?artid=164486&tool=pmcentrez&rendertyp). Accessed 18 March 2013.  
777
- 778 75. Copeland T, Venditti DA (2009) Contribution of three life history types to smolt production  
779 in a Chinook salmon (*Oncorhynchus tshawytscha*) population. *Can J Fish Aquat Sci* 66: 1658–  
780 1665.  
781
- 782 76. Burke JL (2004) Life histories of juvenile chinook salmon in the Columbia River estuary:  
783 1916 to the present Oregon State University.  
784
- 785 77. Beechie T, Buhle E, Ruckelshaus M, Fullerton A, Holsinger L (2006) Hydrologic regime and  
786 the conservation of salmon life history diversity. *Biol Conserv* 130: 560–572. Available:  
787 <http://linkinghub.elsevier.com/retrieve/pii/S0006320706000450>. Accessed 15 March 2013.  
788

- 789 78. De Mérona B, Mendes dos Santos G, Gonç alves de Almeida R (2001) Short term effects of  
790 Tucuru  Dam (Amazonia, Brazil) on the trophic organization of fish communities. *Biol Fishes*  
791 60: 375–392. Available: <http://link.springer.com/article/10.1023/A:1011033025706>. Accessed 30  
792 May 2014.
- 793
- 794 79. JICA, Japan International Cooperation Agency: Sanyo Techno Marine I, IBAMA, Japan  
795 (1998) The fishery resources study of the Amazon and Tocantins river mouth areas in the  
796 Federative Republic of Brazil: final report. Tokyo. 332 p. Available:  
797 <http://lvzopac.jica.go.jp/external/library?func=function.opacsch.mmindex&view=view.opacsch.t>  
798 [oshoshozodsp&lang=eng&shoshisbt=1&shoshino=0000097380&volno=0](http://lvzopac.jica.go.jp/external/library?func=function.opacsch.mmindex&view=view.opacsch.t)

799 **Tables**

800 **Table 1. *Brachyplatystoma* spp. sample information**

| Species                                                    | Sample Number | Location | Total Length (cm) | Weight (kg) |
|------------------------------------------------------------|---------------|----------|-------------------|-------------|
| <i>Brachyplatystoma rousseauxii</i><br>( <i>dourada</i> )  | BR1           | Belém    | 75                | 8.00        |
|                                                            | BR3           | Belém    | 75                | 8.00        |
|                                                            | BR6           | Belém    | 75                | 8.00        |
|                                                            | BR7           | Belém    | 75                | 8.00        |
|                                                            | BR8           | Belém    | 75                | 8.00        |
|                                                            | BR10          | Belém    | 75                | 8.00        |
|                                                            | BR12          | Belém    | 75                | 8.00        |
|                                                            | BR14          | Belém    | 75                | 8.00        |
|                                                            | BR16          | Belém    | 75                | 8.00        |
|                                                            | BR18          | Belém    | 100               | 22.00       |
|                                                            | BR19          | Manaus   | 110               | 11.00       |
|                                                            | BR21          | Manaus   | 100               | 6.00        |
|                                                            | BR23          | Manaus   | 115               | 10.00       |
|                                                            | BR24          | Manaus   | 75                | 3.70        |
| BR25                                                       | Manaus        | 80       | 4.00              |             |
|                                                            | BR26*         | Manaus   | -                 | -           |
| <i>Brachyplatystoma vaillanti</i><br>( <i>piramutaba</i> ) | BV1           | Manaus   | 75                | 4.19°       |
|                                                            | BV2           | Manaus   | 70                | 3.38°       |
|                                                            | BV3           | Manaus   | 68                | 3.09°       |
|                                                            | BV4           | Manaus   | 65                | 2.68°       |
|                                                            | BV5           | Manaus   | 70                | 3.38°       |
| <i>Brachyplatystoma filamentosum</i><br>( <i>piraíba</i> ) | BF1           | Belém    | 220               | 110.00      |
|                                                            | BF3           | Belém    | 250               | 130.00      |
|                                                            | BF5           | Belém    | 90                | 20.00       |

801  
802 \* Asterisci otolith. Analysis was excluded due to low Sr concentrations

803 ° Weights are estimated from length-to-weight ratios

804 Fish were collected from two locations in the Brazilian Amazon; in the cities of Belém near the  
805 mouth of the Amazon River, and Manaus in the central Amazon Basin. Piramutaba were gutted  
806 prior to otolith collection. Their weights are estimated from a length-to-weight relationship from  
807 Pirker [56].

808

809

**Table 2. Isotopic and geologic makeup of major watersheds of the Amazon River basin**

| Sample Point Name<br>(From Literature) | Literature Source         | River           | River Group Classification           | $^{87}\text{Sr}/^{86}\text{Sr}$ | St. Dev. | N  | Geology Percent Area |          |             | Mean Age<br>(Ma) |
|----------------------------------------|---------------------------|-----------------|--------------------------------------|---------------------------------|----------|----|----------------------|----------|-------------|------------------|
|                                        |                           |                 |                                      |                                 |          |    | Carboniferous        | Tertiary | Precambrian |                  |
| Amazon 13                              | Gaillardet et al. 1997    | Amazon          | Wester Tributaries & Amazon Mainstem | 0.710728                        | -        | 1  | 1%                   | 47%      | 21%         | 409              |
| Amazon 14                              | Gaillardet et al. 1997    | Amazon          | Wester Tributaries & Amazon Mainstem | 0.71112                         | -        | 1  | 1%                   | 47%      | 21%         | 409              |
| Amazon 20                              | Gaillardet et al. 1997    | Amazon          | Wester Tributaries & Amazon Mainstem | 0.711478                        | -        | 1  | 2%                   | 42%      | 25%         | 429              |
| Amazon 6                               | Gaillardet et al. 1997    | Amazon          | Wester Tributaries & Amazon Mainstem | 0.709172                        | -        | 1  | 0%                   | 60%      | 17%         | 407              |
| Rio Madeira                            | Gaillardet et al. 1997    | Lower Madeira   | Beni-Madeira & Lower Negro           | 0.720036                        | -        | 1  | 2%                   | 20%      | 30%         | 412              |
| Rio Negro                              | Gaillardet et al. 1997    | Lower Negro     | Beni-Madeira & Lower Negro           | 0.716223                        | -        | 1  | 0%                   | 21%      | 68%         | 1243             |
| Rio Topajos                            | Gaillardet et al. 1997    | Lower Topajos   | Lower Amazon Tributaries             | 0.733172                        | -        | 1  | 10%                  | 8%       | 48%         | 658              |
| Rio Trombetas                          | Gaillardet et al. 1997    | Lower Trombetas | Lower Amazon Tributaries             | 0.732295                        | -        | 1  | 3%                   | 7%       | 78%         | 515              |
| Uracara                                | Gaillardet et al. 1997    | Lower Uracara   | Lower Amazon Tributaries             | 0.723584                        | -        | 1  | 2%                   | 19%      | 62%         | 558              |
| Purus                                  | Queiroz et al. 2009       | Lower Purus     | Wester Tributaries & Amazon Mainstem | 0.711135                        | -        | 1  | 0%                   | 92%      | 4%          | 564              |
| Solimões*                              | Queiroz et al. 2009       | Lower Solimões  | Wester Tributaries & Amazon Mainstem | 0.714461                        | -        | 1  | 0%                   | 63%      | 1%          | 289              |
| Atalaya                                | Santos et al. 2013        | Upper Solimões  | Wester Tributaries & Amazon Mainstem | 0.70887                         | -        | 1  | 0%                   | 20%      | 0%          | 331              |
| Borba                                  | Santos et al. 2013        | Lower Madeira   | Beni-Madeira & Lower Negro           | 0.71762                         | -        | 1  | 2%                   | 20%      | 30%         | 412              |
| Borja                                  | Santos et al. 2013        | Upper Solimões  | Wester Tributaries & Amazon Mainstem | 0.7085                          | -        | 1  | 0%                   | 13%      | 0%          | 426              |
| Caracarai                              | Santos et al. 2013        | Upper Negro     | Beni-Madeira & Lower Negro           | 0.72238                         | -        | 1  | 0%                   | 0%       | 74%         | 1650             |
| Francisco de Orellana                  | Santos et al. 2013        | Upper Solimões  | Wester Tributaries & Amazon Mainstem | 0.70592                         | 0.00037  | 26 | 0%                   | 67%      | 10%         | 287              |
| Itiatuba                               | Santos et al. 2013        | Lower Tapajos   | Lower Amazon Tributaries             | 0.72964                         | 0.00587  | 27 | 10%                  | 4%       | 51%         | 671              |
| LaBrea                                 | Santos et al. 2013        | Lower Purus     | Wester Tributaries & Amazon Mainstem | 0.71012                         | -        | 1  | 0%                   | 90%      | 6%          | 1126             |
| Manacapuru                             | Santos et al. 2013        | Lower Solimões  | Wester Tributaries & Amazon Mainstem | 0.70907                         | 0.00025  | 38 | 0%                   | 72%      | 2%          | 312              |
| Obidos                                 | Santos et al. 2013        | Amazon          | Wester Tributaries & Amazon Mainstem | 0.71154                         | 0.00053  | 46 | 1%                   | 46%      | 23%         | 408              |
| PortoVelho                             | Santos et al. 2013        | Lower Madeira   | Beni-Madeira & Lower Negro           | 0.71677                         | 0.00073  | 9  | 3%                   | 17%      | 22%         | 379              |
| Ruranbaque                             | Santos et al. 2013        | Upper Madeira   | Beni-Madeira & Lower Negro           | 0.71730                         | 0.00126  | 38 | 17%                  | 13%      | 1%          | 433              |
| Serrinha                               | Santos et al. 2013        | Upper Negro     | Lower Amazon Tributaries             | 0.73183                         | 0.00737  | 16 | 0%                   | 19%      | 80%         | 614              |
| Tabitinga                              | Santos et al. 2013        | Upper Solimões  | Wester Tributaries & Amazon Mainstem | 0.70881                         | 0.00029  | 9  | 0%                   | 75%      | 3%          | 200              |
| Amazon Mouth (Predicted)               | Predicted from regression | Amazon          | Wester Tributaries & Amazon Mainstem | 0.71625                         | 0.00787° | -  | 2%                   | 40%      | 29%         | 482              |
| Jari (Predicted)                       | Predicted from regression | Lower Jari      | Lower Amazon Tributaries             | 0.72928                         | 0.00873° | -  | 0%                   | 2%       | 89%         | 718              |
| Paru (Predicted)                       | Predicted from regression | Lower Paru      | Lower Amazon Tributaries             | 0.72703                         | 0.00845° | -  | 1%                   | 4%       | 78%         | 515              |
| Tocantins (Predicted)                  | Predicted from regression | Lower Tocantins | Lower Amazon Tributaries             | 0.72683                         | 0.00884° | -  | 13%                  | 22%      | 36%         | 877              |
| Xingu (Predicted)                      | Predicted from regression | Lower Xingu     | Lower Amazon Tributaries             | 0.72633                         | 0.00827° | -  | 2%                   | 13%      | 70%         | 1091             |

811

812

813 \* Outlier dropped from regression analysis

814 ° Values are prediction intervals of the regression from Equation 1.

815 Strontium ratios were taken from water samples reported in the literature for locations throughout the Amazon Basin and used as baselines to  
816 determine the likely location of fish movement. These samples were classified to three statistically distinguishable river group classifications  
817 using quadratic discriminant function analysis. Unsampled locations were predicted using geologic regression (Equation 1).

818

819

820

821

## 822 **Figures**

823

824

### 825 **Figure 1. Water sampling points and geology of the Amazon River** 826 **basin**

827 Maps show (A) the location of  $^{87}\text{Sr}/^{86}\text{Sr}$  water samples within the Amazon River basin digitized  
828 by the authors from location descriptions in the literature [51–53] and points predicted from  
829 Equation 1. The geological age and composition of the basin (B) used to predict the  $^{87}\text{Sr}/^{86}\text{Sr}$   
830 signatures of unsampled watersheds is also shown. Maps created using USGS datasets [59–61]

831

832

### 833 **Figure 2. Otolith sectioning and analysis**

834 Representative transverse section from a dourada lapillus otolith showing the analysis area (in  
835 red) used for all otoliths with the laser-ablation tracks indicated. All analyses were performed  
836 approximately perpendicular to the growth rings.

837

838

### 839 **Figure 3. River isotopic signatures throughout the Amazon River** 840 **basin**

841 Strontium ratio values (y-axis) for each sampled and predicted watershed (x-axis) in the current  
842 study. Color indicates the classification to three river groups using quadratic discriminant  
843 function analysis. Solid error bars indicate the standard deviation where samples were repeated  
844 over time (See Table 1 for sample sizes). Dashed error bars indicate the prediction intervals from  
845 the geologic regression (Equation 1) used to predict that point. Points bordered in black were  
846 misclassified during cross validation of the quadratic discriminant function.

847

848

### 849 **Figure 4. Location classification of $^{87}\text{Sr}/^{86}\text{Sr}$ signatures in otolith** 850 **transects**

851 Plots show the variation in  $^{87}\text{Sr}/^{86}\text{Sr}$  (y-axis) over the life of sampled fish, represented as distance  
852 from the otolith core in microns (x-axis). Horizontal colored lines indicate stable signatures  
853 identified using changepoint analysis, with colors representing inclusion in one of three  
854 statistically distinguishable river groups based on quadratic discriminant analysis. Fourteen  
855 samples of dourada (A) were collected in Belém and Manaus fish markets. Five samples of  
856 piramutaba (B) were collected in Manaus. Three samples of piraíba (C) were collected in Belém.  
857 Dark grey chart labels indicate a different y-axis scale was used to accommodate large variations  
858 in  $^{87}\text{Sr}/^{86}\text{Sr}$ . The x-axis scale differs for all fish depending on the width of the otolith, which  
859 varies based on age, growth and species specific factors.

860



861 **Supporting Information**

862

863 **S1 Table. Otolith transect data.** Table of raw otolith transect data for each sample  
864 analyzed.

865

**A**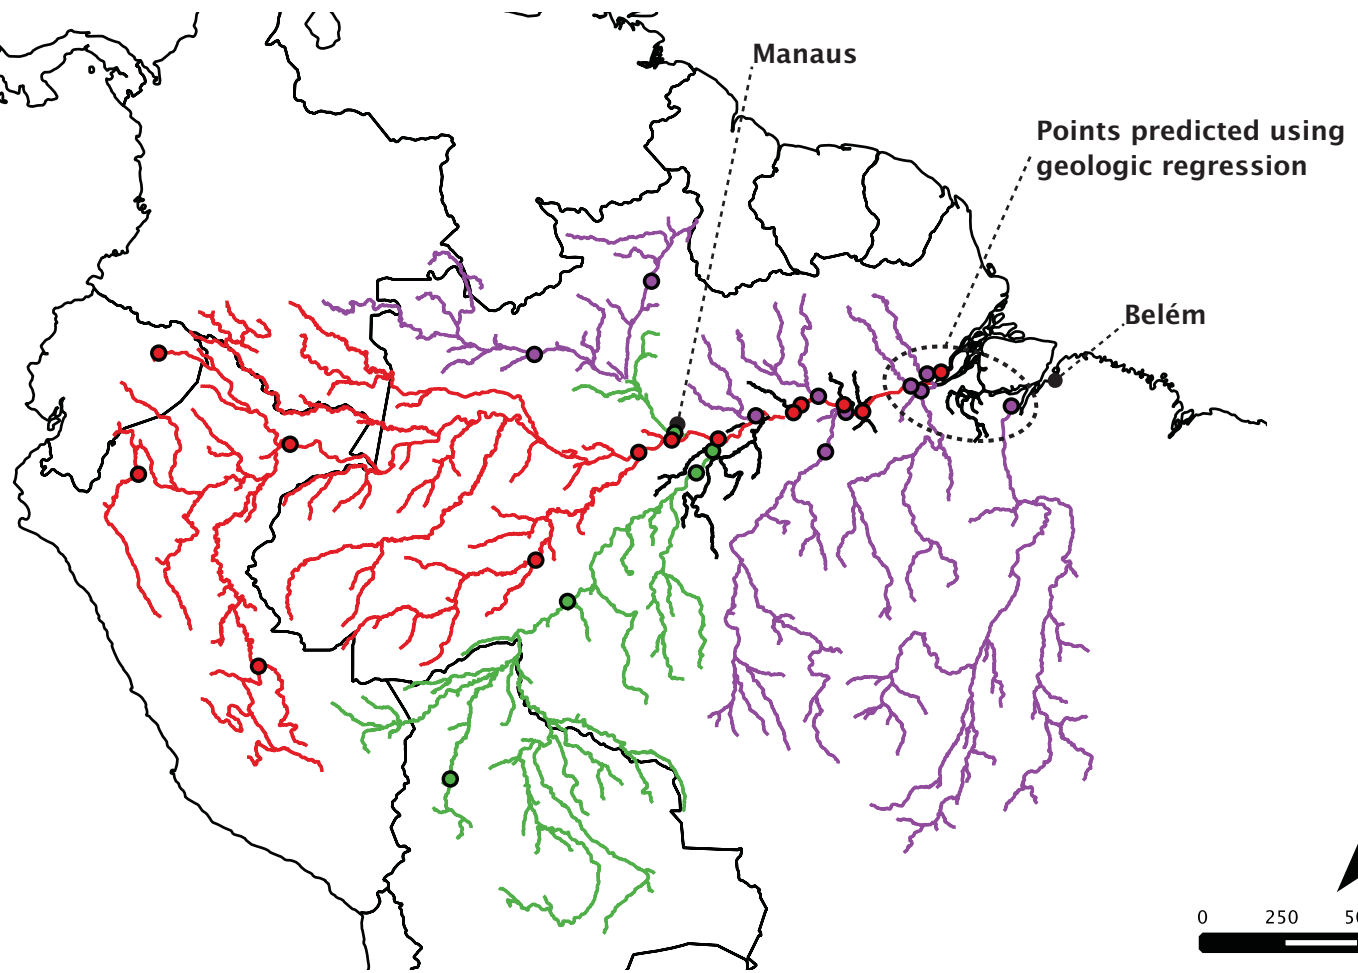

### Water Sampling Points and Tributaries

Colored By Isotopically Distinct River Group

- Western Tributaries & Amazon River Mainstem
- Beni-Madeira & Lower Negro River
- Lower Amazon River Tributaries

**B**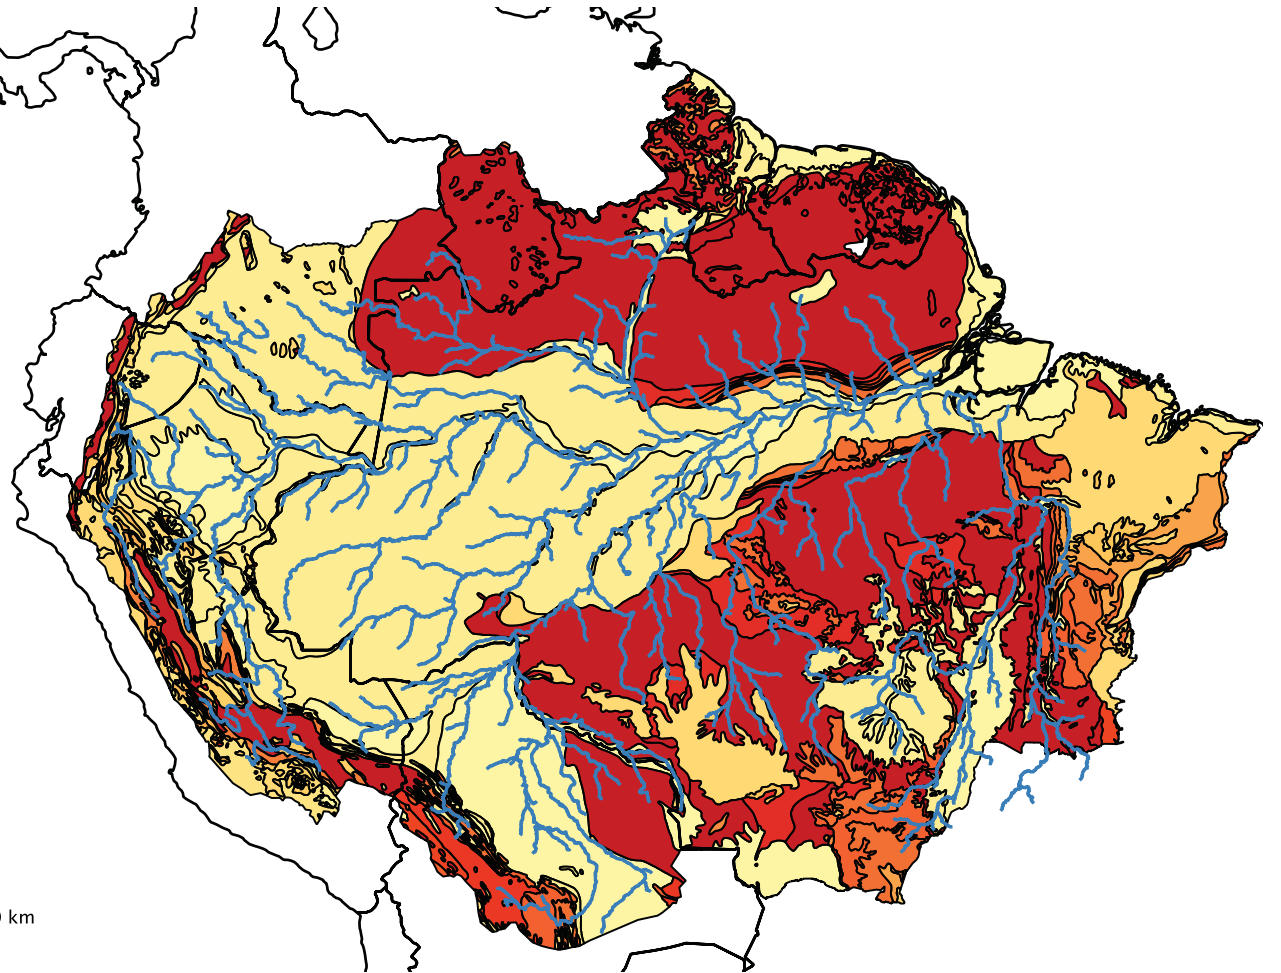

### Amazon Geology Colored By Age

— River Course

#### Geology

- |                                 |                                |                                 |                         |
|---------------------------------|--------------------------------|---------------------------------|-------------------------|
| Quaternary                      | Cretaceous (undivided)         | Paleozoic - Mesozoic Intrusives | Ordovician - Cambrian   |
| Tertiary                        | Mesozoic - Cenozoic Intrusives | Permian - Carboniferous         | Cambrian                |
| Cretaceous - Tertiary Volcanics | Mesozoic Volcanics             | Carboniferous                   | Precambrian - Paleozoic |
|                                 | Jurassic (undivided)           | Devonian (undivided)            | Precambrian (undivided) |
|                                 | Jurassic - Triassic            | Paleozoic                       | Unmapped/Water Bodies   |
|                                 | Triassic                       | Silurian                        |                         |
|                                 | Permian                        | Silurian - Ordovician           |                         |

**Laser Ablation**

**Medial**

**Dorsal**

**Ventral**

**Core**

**Lateral**

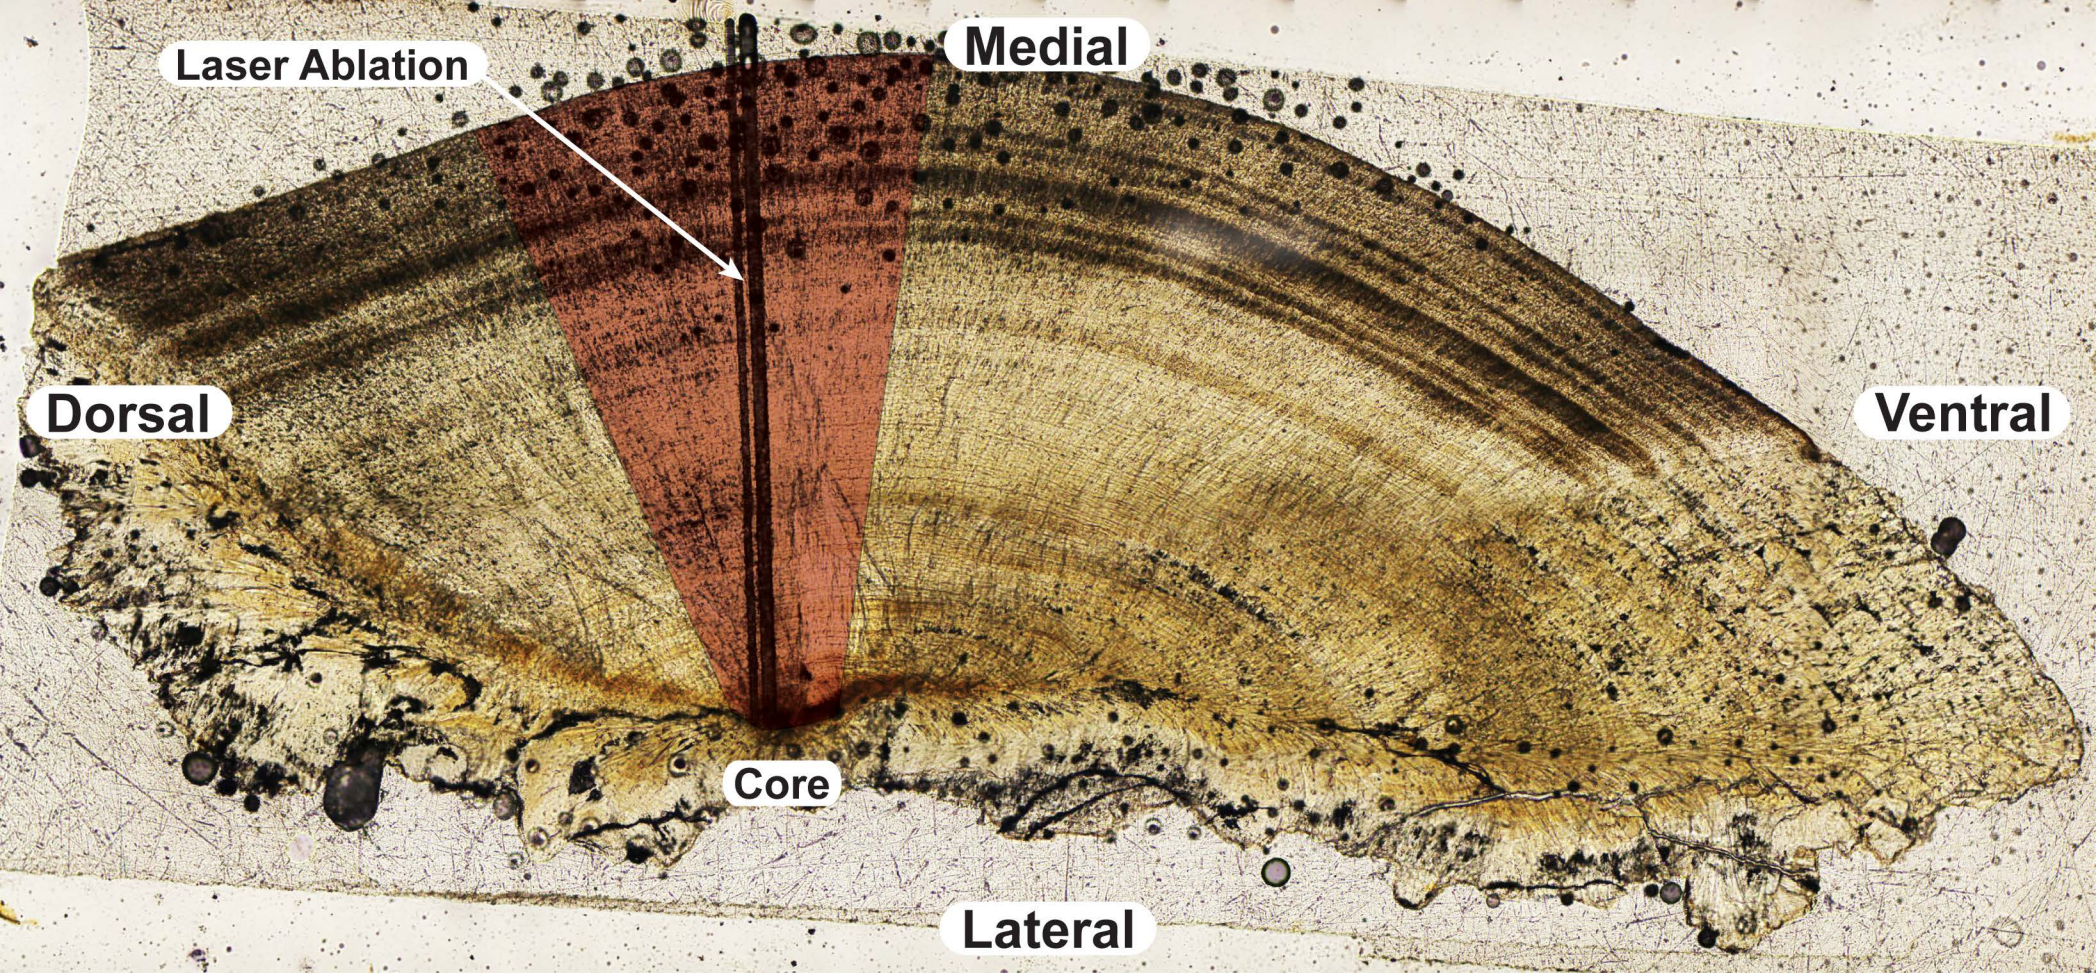

$^{87}\text{Sr}/^{86}\text{Sr}$ 0.71  
0.72  
0.73  
0.74

Amazon

Beni

Branco

Jari

Madeira

Maranon

Napo

Negro

Paru

Purus

Solimoes

Tapajos

Tocantins

Trombetas

Ucayali

Uracara

Xingu

River

**River Group Classification**

- Western Tributaries & Amazon Mainstem
- Beni-Madeira & Lower Negro
- Lower Amazon Tributaries

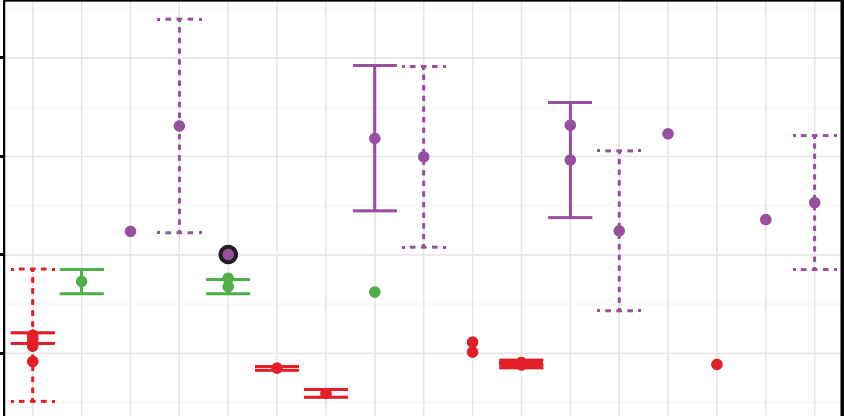

# (A) Dourada (*B. rousseauxii*)

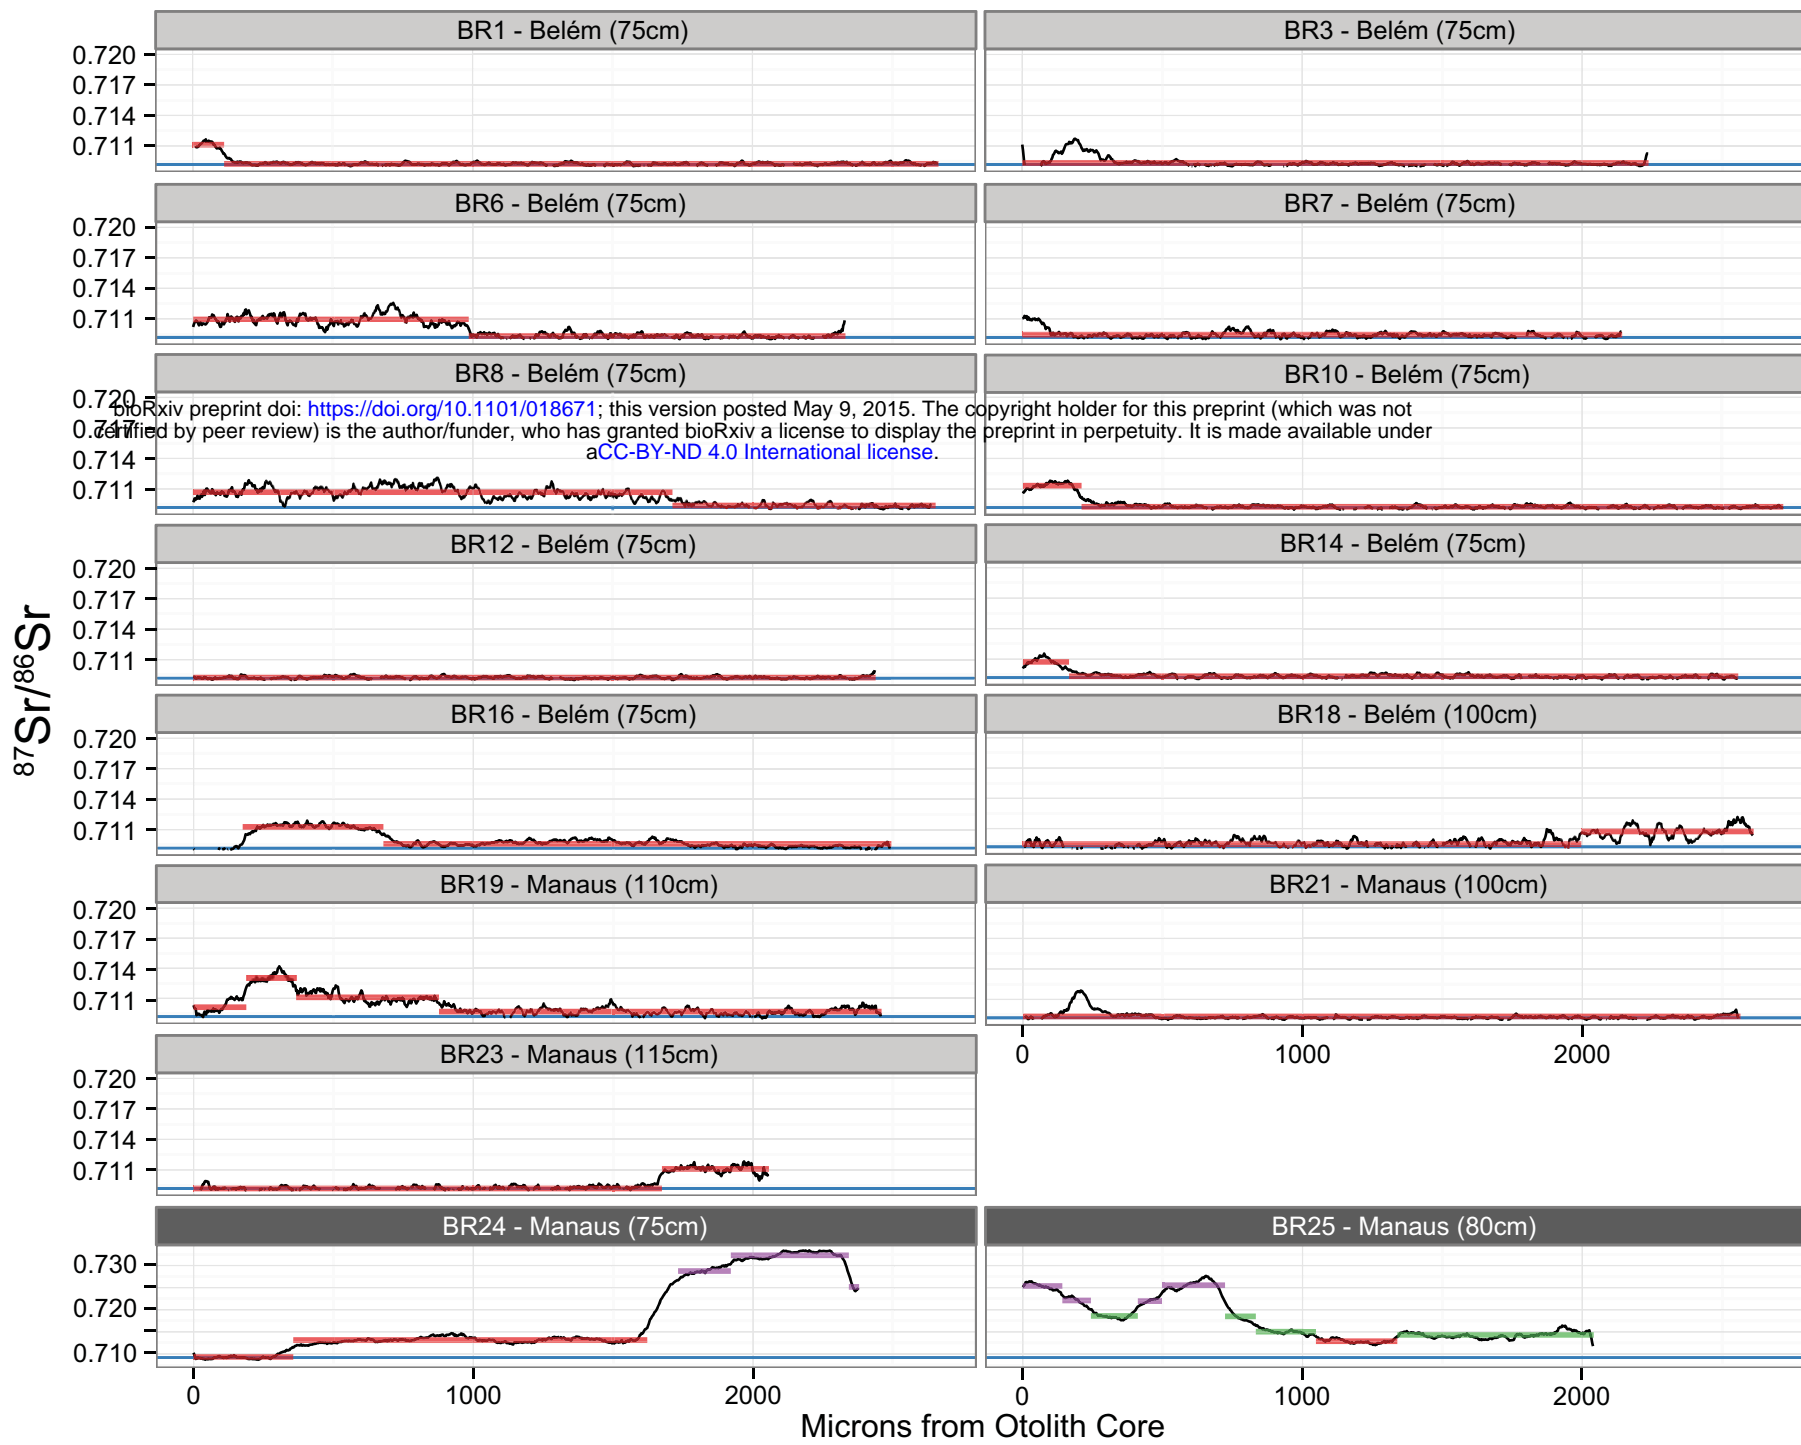

# (B) Piramutaba (*B. vaillantii*)

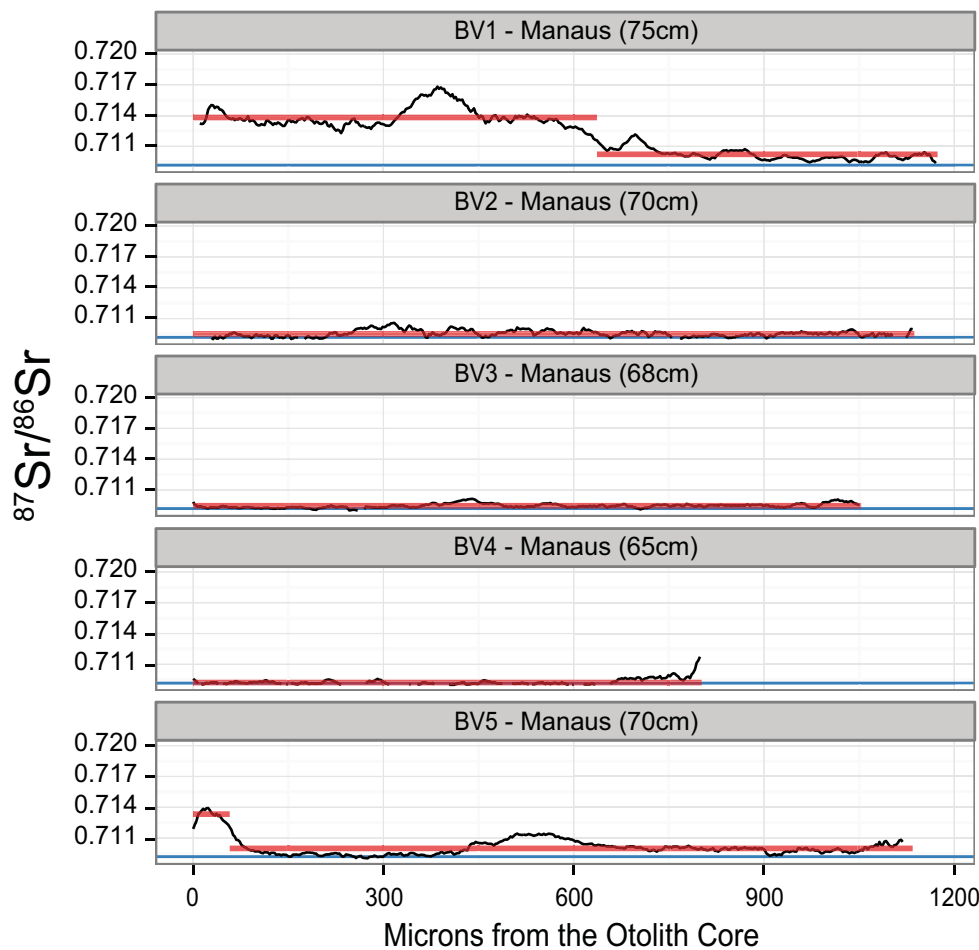

# (C) Piraíba (*B. filamentosum*)

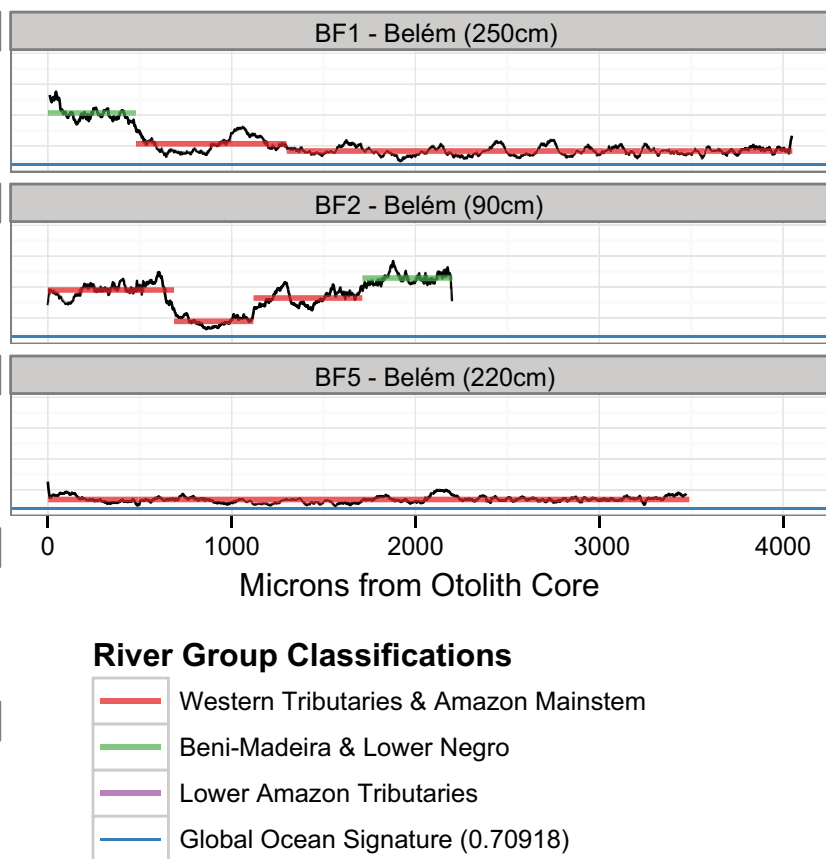

Source: http://biorxiv.org/content/10.1101/018671v2.full.pdf
